# Supplementary material
Source: PubMed Central journal article supplement (PMC6990819)
Supplement: jama-322-2303-s001.pdf [file jama-322-2303-s001.pdf]

## Supplementary Online Content

Guihard B, Chollet-Xémard C, Lakhnati P. Effect of rocuronium vs succinylcholine on endotracheal intubation success rate among patients undergoing out-of-hospital rapid sequence intubation: a randomized clinical trial. *JAMA*. doi:10.1001/jama.2019.18254

Trial protocol

This supplementary material has been provided by the authors to give readers additional information about their work.

1 **Comparison of the usage of succinylcholine and rocuronium**  
2 **for intubation in pre-hospitalization emergencies. A multi-**  
3 **centric, non-inferiority, randomized, controlled and blind**  
4 **study.**

6 **CURASMUR**

7 Promoter code:

8 **BIOMEDICAL RESEARCH PROTOCOL**

9 Version 1.0 of 23/01/2012

10 which has received the favourable opinion of the CPP (Institutional Review Board), the date, and the  
11 authorization of the Afssaps

12 EudraCT Number:

14 **This biomedical research project was funded by *funding source***

15 Sponsor:

16 Regional Hospital Center of Reunion Island  
17 Félix Guyon Hospital Center  
18 97405 Saint Denis Cedex

20 Coordinating researcher:

21 Dr Xavier Combes  
22 Regional Hospital Center of Reunion Island – Site of CHFG  
23 SAMU 974,  
24 97405 St Denis of Reunion Island

26 Methodological support:

27 CHR of Reunion Island – Site of CHFG  
28 97 405 Saint Denis Cedex

29 SAMU of Paris, Necker Hospital - Enfants Malades  
30 149 rue de Sèvres  
31 75015 PARIS

33 Safety and Surveillance Unit for Clinical Research:

34 Pharmacovigilance Center  
35 CHU Pellegrin Hospital  
36 Place Amélie Raba-Léon  
37 33076 Bordeaux Cedex

39 **This protocol was designed and edited from version 2.0 of 01/09/2011 of the DIRC Sud-**  
40 **Ouest Outre-Mer protocol type**

41 **PROTOCOL VERSION HISTORY**

42

| VERSION | DATE       | REASON FOR UPDATE                                                    |
|---------|------------|----------------------------------------------------------------------|
| 1.0     | 23/01/2012 | Submission to the National Clinical Research Hospital Programme 2012 |
|         |            |                                                                      |
|         |            |                                                                      |
|         |            |                                                                      |

43

44

45

46

47

48

49

50

51

52

53

54

55

56

57

58

**PROTOCOL SIGNATURE PAGE**

59

60

**Comparison of the usage of succinylcholine and rocuronium for intubation in pre-hospitalization emergencies. A multi-centric, non-inferiority, randomized, controlled and blind study.**

61

62

63

64

65

**CURASMUR**

66

**Sponsor code :**

67

68

69

**Sponsor**

70

Regional Hospital Center of Reunion Island at on this day, the:

71

Félix Guyon Hospital Center

72

Route de Bellepierre

73

97 405 Saint Denis cedex

74

General Manager of Reunion Island CHR

75

Michel CALMON

76

And by delegation, Deputy Director for

77

Research

78

Joaquin MARTINEZ

79

80

81

82

**Coordinating researcher**

83

Dr. Xavier COMBES

84

SAMU 974

85

CHR of Reunion Island – Site of CH Félix Guyon

86

Route de Bellepierre

87

97405 St Denis Cedex

88

Tel : 02 62 90 20 72

89

Mail: [x.combes.samu974@chr-reunion.fr](mailto:x.combes.samu974@chr-reunion.fr)

90

91

92

Dr. Xavier Combes

|     |                                                                                             |     |                                                                                                |
|-----|---------------------------------------------------------------------------------------------|-----|------------------------------------------------------------------------------------------------|
| 93  |                                                                                             |     |                                                                                                |
| 94  |                                                                                             |     |                                                                                                |
| 95  |                                                                                             | 135 | <b>Sponsor</b>                                                                                 |
| 96  | <b>Coordinating Researcher</b>                                                              | 136 | <b>Sponsor</b>                                                                                 |
| 97  | Dr Xavier COMBES                                                                            | 137 | Regional Hospital Center of Reunion Island – Site                                              |
| 98  | SAMU 974                                                                                    | 138 | of CHFG                                                                                        |
| 99  | Regional Hospital Center of                                                                 | 139 | 97 405 Saint Denis cedex                                                                       |
| 100 | Reunion Island – Site of CHFG                                                               | 140 |                                                                                                |
| 101 | Route de Bellepierre                                                                        | 141 | <b>Head of Research in the capacity of sponsor</b>                                             |
| 102 | 97405 St Denis Cedex                                                                        | 142 | Joaquin MARTINEZ                                                                               |
| 103 | Tel : 02 62 90 20 72                                                                        | 143 | Deputy Director for Research                                                                   |
| 104 | Mail : <a href="mailto:x.combes.samu974@chr-reunion.fr">x.combes.samu974@chr-reunion.fr</a> | 144 | Tel: 02 62 71 98 52 – Fax : 02 62 71 98 34                                                     |
| 105 |                                                                                             | 145 | Mail : <a href="mailto:joaquin.martinez@chr-reunion.fr">joaquin.martinez@chr-reunion.fr</a>    |
| 106 | <b>Project leader – Internal Promotion</b>                                                  | 146 |                                                                                                |
| 107 | Fideline FILLEUL                                                                            | 147 |                                                                                                |
| 108 | Regional Hospital Center of Reunion Island –                                                | 148 |                                                                                                |
| 109 | Site of CHFG                                                                                | 149 | <b>Clinical Research Director</b>                                                              |
| 110 | Route de Bellepierre                                                                        | 150 | Vanessa BASQUE                                                                                 |
| 111 | 97 405 Saint Denis cedex                                                                    | 151 | CHR of Reunion Island – Site of GHSR                                                           |
| 112 | Tel : 02 62 90 68 84 - Fax : 02 62 90 69 21                                                 | 152 | Bd François Mitterrand – BP 350                                                                |
| 113 | Mail : <a href="mailto:fideline.filleul@chr-reunion.fr">fideline.filleul@chr-reunion.fr</a> | 153 | 97448 Saint Pierre Cedex                                                                       |
| 114 |                                                                                             | 154 | Tel : 02 62 35 95 25 - Fax : 02 62 35 97 21                                                    |
| 115 |                                                                                             | 155 | Mail : <a href="mailto:vanessa.basque@chr-reunion.fr">vanessa.basque@chr-reunion.fr</a>        |
| 116 | <b>Methodological Support Unit</b>                                                          | 156 |                                                                                                |
| 117 | Dr. Laetitia HUIART                                                                         | 157 | <b>Safety and surveillance unit for clinical</b>                                               |
| 118 | Cyril FERDYNUS                                                                              | 158 | <b>research:</b>                                                                               |
| 119 | Regional Hospital Center of Reunion Island                                                  | 159 | Pharmacovigilance Center                                                                       |
| 120 | Site of CHFG                                                                                | 160 | CHU Pellegrin Hospital                                                                         |
| 121 | Route de Bellepierre                                                                        | 161 | Place Amélie Raba-Léon,                                                                        |
| 122 | 97 405 Saint Denis cedex                                                                    | 162 | 33076 Bordeaux Cedex                                                                           |
| 123 | Tel : 02 62 90 68 81 / 82                                                                   | 163 | Tel: 05 57 57 46 64 - Fax: 05 56 79 49 26                                                      |
| 124 | Mail : <a href="mailto:usm@chr-reunion.fr">usm@chr-reunion.fr</a>                           | 164 | <a href="mailto:anne.gimbert@pharmaco.u-bordeaux2.fr">anne.gimbert@pharmaco.u-bordeaux2.fr</a> |
| 125 |                                                                                             | 165 | <a href="mailto:francoise.haramburu@u-bordeaux2.fr">francoise.haramburu@u-bordeaux2.fr</a>     |
| 126 | Patricia JABRE                                                                              | 166 | <a href="mailto:ghada.miremont@u-bordeaux2.fr">ghada.miremont@u-bordeaux2.fr</a>               |
| 127 | SAMU de Paris, Hôpital Necker - Enfants                                                     | 167 |                                                                                                |
| 128 | Malades                                                                                     | 168 |                                                                                                |
| 129 | 149 rue de Sèvres                                                                           | 169 |                                                                                                |
| 130 | 75015 PARIS                                                                                 | 170 |                                                                                                |
| 131 | Tel : 01 44 49 24 72                                                                        | 171 |                                                                                                |
| 132 | Mail: <a href="mailto:patricia.jabre@nck.aphp.fr">patricia.jabre@nck.aphp.fr</a>            | 172 |                                                                                                |
| 133 |                                                                                             | 173 |                                                                                                |
| 134 |                                                                                             | 174 |                                                                                                |
|     |                                                                                             | 175 |                                                                                                |

176

|     |                                                                                                     |           |
|-----|-----------------------------------------------------------------------------------------------------|-----------|
| 177 | <b>SUMMARY</b>                                                                                      |           |
| 178 | <b>PROTOCOL SIGNATURE PAGE</b>                                                                      | <b>4</b>  |
| 179 | <b>SUMMARY</b>                                                                                      | <b>6</b>  |
| 180 | <b>1. SUMMARY OF THE RESEARCH</b>                                                                   | <b>10</b> |
| 181 | <b>2. SCIENTIFIC JUSTIFICATION AND GENERAL DESCRIPTION</b>                                          | <b>13</b> |
| 182 | 2.1. CURRENT STATE OF KNOWLEDGE                                                                     | <b>13</b> |
| 183 | 2.1.1. PATHOLOGY                                                                                    | <b>13</b> |
| 184 | 2.1.2. STANDARDS OF CARE AND THE STUDY                                                              | <b>14</b> |
| 185 | 2.2. HYPOTHESES OF RESEARCH                                                                         | <b>15</b> |
| 186 | 2.3. EXPECTED IMPLICATIONS                                                                          | <b>15</b> |
| 187 | 2.4. EXPERIENCE OF PARTICIPATING TEAMS ON THIS SUBJECT                                              | <b>15</b> |
| 188 | 2.5. FEASIBILITY OF THE STUDY                                                                       | <b>15</b> |
| 189 | <b>3. OBJECTIVES OF THE RESEARCH</b>                                                                | <b>16</b> |
| 190 | 3.1. PRIMARY OBJECTIVE                                                                              | <b>16</b> |
| 191 | 3.2. SECONDARY OBJECTIVES                                                                           | <b>16</b> |
| 192 | <b>4. RESEARCH DESIGN</b>                                                                           | <b>17</b> |
| 193 | 4.1. RESEARCH PLAN                                                                                  | <b>17</b> |
| 194 | 4.2. METHODS FOR RANDOMIZATION                                                                      | <b>17</b> |
| 195 | <b>5. CRITERIA FOR ELIGIBILITY</b>                                                                  | <b>17</b> |
| 196 | 5.1. INCLUSION CRITERIA                                                                             | <b>17</b> |
| 197 | 5.2. NON-INCLUSION CRITERIA                                                                         | <b>17</b> |
| 198 | 5.3. RECRUITMENT PROCESS                                                                            | <b>18</b> |
| 199 | <b>6. TREATMENTS OF THE RESEARCH</b>                                                                | <b>18</b> |
| 200 | 6.1. TREATMENT OF THE STUDY                                                                         | <b>18</b> |
| 201 | 6.2. COMPARISON TREATMENT                                                                           | <b>18</b> |
| 202 | 6.3. DESCRIPTION OF THE METHODS OF USE OF MEDICATION                                                | <b>18</b> |
| 203 | 6.4. DESCRIPTION OF ALL MEDICATION USED FOR THE PURPOSES OF RESEARCH OTHER THAN THE MEDICATION THAT |           |
| 204 | FORMS THE SUBJECT OF THE RESEARCH                                                                   | <b>19</b> |
| 205 | 6.5. PRODUCT PIPELINE                                                                               | <b>19</b> |
| 206 | <b>7. ASSOCIATED TREATMENTS/PROCEDURES</b>                                                          | <b>19</b> |
| 207 | 7.1. AUTHORIZED ASSOCIATED TREATMENTS/PROCEDURES                                                    | <b>19</b> |
| 208 | 7.2. PROHIBITED ASSOCIATED TREATMENTS/PROCEDURES                                                    | <b>20</b> |
| 209 | <b>8. JUDGMENT CRITERIA</b>                                                                         | <b>20</b> |
| 210 | 8.1. PRIMARY JUDGMENT CRITERION                                                                     | <b>20</b> |
| 211 | 8.2. SECONDARY JUDGMENT CRITERIA                                                                    | <b>20</b> |

|     |                                                                         |           |
|-----|-------------------------------------------------------------------------|-----------|
| 212 | <b>9. PROGRESS OF THE RESEARCH</b>                                      | <b>20</b> |
| 213 | 9.1. TIMELINE FOR RESEARCH                                              | 20        |
| 214 | 9.2. SUMMARIZED TABLE OF PATIENT MONITORING                             | 20        |
| 215 | 9.3. INFORMATION AND COLLECTION OF CONSENT                              | 22        |
| 216 | 9.4. RANDOMIZATION METHODOLOGY                                          | 23        |
| 217 | 9.5. INCLUSION                                                          | 23        |
| 218 | 9.6. RULES FOR CESSATION OF RESEARCH                                    | 23        |
| 219 | <b>10. MANAGEMENT OF ADVERSE EVENTS AND NEW FACTS</b>                   | <b>24</b> |
| 220 | 10.1. DEFINITIONS                                                       | 24        |
| 221 | 10.2. DESCRIPTION OF EXPECTED SERIOUS ADVERSE EVENTS                    | 24        |
| 222 | 10.3. PROCESS TO FOLLOW IN THE EVENT OF AN ADVERSE EVENT OR NEW FACTORS | 25        |
| 223 | 10.4. DECLARATION AND REGISTRATION OF UNEXPECTED SAE AND NEW FACTORS    | 25        |
| 224 | 10.5. ANNUAL SAFETY REPORT                                              | 26        |
| 225 | <b>11. STATISTICAL ASPECTS</b>                                          | <b>26</b> |
| 226 | 11.1. CALCULATION OF THE STUDY SIZE                                     | 26        |
| 227 | 11.2. DESCRIPTIVE ANALYSIS                                              | 26        |
| 228 | 11.3. STATISTICAL TESTS                                                 | 27        |
| 229 | 11.4. PRIMARY CRITERION OF EFFICACY: FREQUENCY OF SUCCESSFUL INTUBATION | 27        |
| 230 | 11.5. SECONDARY CRITERIA                                                | 27        |
| 231 | 11.6. STUDY POPULATIONS                                                 | 27        |
| 232 | 11.7. INTERIM ANALYSIS                                                  | 28        |
| 233 | 11.8. DATA ANALYSIS AND GROUPWARE CONTROLLER                            | 28        |
| 234 | <b>12. RESEARCH MONITORING</b>                                          | <b>28</b> |
| 235 | 12.1. PILOT COMMITTEE                                                   | 28        |
| 236 | 12.2. INDEPENDENT MONITORING COMMITTEE                                  | 28        |
| 237 | <b>13. SOURCE RIGHT OF ACCESS TO DATA AND SOURCE DOCUMENTS</b>          | <b>29</b> |
| 238 | 13.1. ACCESS TO DATA                                                    | 29        |
| 239 | 13.2. SOURCE DATA                                                       | 29        |
| 240 | 13.3. DATA CONFIDENTIALITY                                              | 29        |
| 241 | <b>14. QUALITY ASSURANCE AND CONTROL</b>                                | <b>30</b> |
| 242 | 14.1. INSTRUCTIONS FOR DATA COLLECTION                                  | 30        |
| 243 | 14.2. RESEARCH MONITORING                                               | 30        |
| 244 | 14.3. QUALITY CONTROL                                                   | 30        |
| 245 | 14.4. MANAGEMENT OF DATA                                                | 30        |
| 246 | 14.5. AUDIT AND INSPECTION                                              | 31        |
| 247 | <b>15. ETHICAL AND REGULATORY CONSIDERATIONS</b>                        | <b>31</b> |
| 248 | <b>16. STORING OF DOCUMENTS AND DATA RELATED TO THE RESEARCH</b>        | <b>32</b> |
| 249 | <b>17. RULES REGARDING PUBLICATION</b>                                  | <b>33</b> |



|     |                                                                                                          |    |
|-----|----------------------------------------------------------------------------------------------------------|----|
| 250 | 17.1. SCIENTIFIC PAPERS                                                                                  | 33 |
| 251 | 17.2. COMMUNICATION OF RESULTS TO PATIENTS                                                               | 33 |
| 252 | 17.3. TRANSFER OF DATA                                                                                   | 33 |
| 253 | <b>BIBLIOGRAPHY</b>                                                                                      | 34 |
| 254 | <b>ANNEXES</b>                                                                                           | 36 |
| 255 | <b>ANNEX 1 : LIST OF RESEARCH CENTRES</b>                                                                | 36 |
| 256 | <b>ANNEX 2 : CLASSIFICATION OF LARYNGEAL VIEW AFTER DIRECT LARYNGOSCOPY ACCORDING TO CORMACK AND</b>     |    |
| 257 | <b>LEHANE.</b>                                                                                           | 37 |
| 258 | <b>ANNEX 3 : INTUBATION DIFFICULTY SCORE (IDS)</b>                                                       | 38 |
| 259 | <b>ANNEX 4 : COPENHAGEN SCORE</b>                                                                        | 39 |
| 260 | <b>ANNEX 5. ALGORITHM IN THE EVENT OF AN UNANTICIPATED DIFFICULT INTUBATION (AS PER 21 AND 22)</b>       | 40 |
| 261 | <b>ANNEX 6.1 BRIEFING NOTE TO PATIENTS</b>                                                               | 41 |
| 262 | <b>ANNEX 6.2 BRIEFING NOTE FOR AN ADULT INDIVIDUAL PARTICIPATING IN BIOMEDICAL RESEARCH (TRACKING IN</b> |    |
| 263 | <b>RESEARCH AFTER EMERGENCY SITUATION)</b>                                                               | 45 |
| 264 | <b>ANNEX 6.3 CONSENT FORM FOR PARTICIPATION IN BIOMEDICAL RESEARCH (TRACKING POST-EMERGENCIES)</b>       | 47 |
| 265 | <b>ANNEX 6.4 : COLLECTION OF EMERGENCY CONSENT</b>                                                       | 48 |
| 266 | <b>ANNEXE 6.5 : BRIEFING NOTE IN EMERGENCY SITUATIONS FOR THE REPRESENTATIVE OF A PERSON UNABLE TO</b>   |    |
| 267 | <b>EXPRESS THEIR CONSENT TO PARTICIPATE IN THE BIOMEDICAL RESEARCH PROJECT TITLED</b>                    | 49 |
| 268 | <b>ANNEXE 6.6 : CONSENT FORM FOR PARTICIPATION IN A BIOMEDICAL RESEARCH PROJECT IN AN EMERGENCY</b>      |    |
| 269 | <b>SITUATION BY THE REPRESENTATIVE OF A PERSON UNABLE TO GIVE THEIR CONSENT.</b>                         | 52 |
| 270 |                                                                                                          |    |
| 271 |                                                                                                          |    |
| 272 |                                                                                                          |    |

---

273 **LIST OF ABBREVIATIONS**

274

275 **RSI** Rapid Sequence Induction

276 **IDS** Intubation Difficulty Scale

277 **SMUR** Emergency Mobile Resuscitation Unit

278 **SAMU** Emergency Services

---

**1. SUMMARY OF THE RESEARCH**

|                                |                                                                                                                                                                                                                                                                                                                                                                                                                                                                                                                                                                                                                                                                                                                                                                                                                                                                                                                                                                                                                                                                                                                                                                                                                                                                                                                                                                                                                                                                                                                                                                                                                                                                                                                                                                                                                                                                                                                                                                                                                                                                                                                                                                                                |
|--------------------------------|------------------------------------------------------------------------------------------------------------------------------------------------------------------------------------------------------------------------------------------------------------------------------------------------------------------------------------------------------------------------------------------------------------------------------------------------------------------------------------------------------------------------------------------------------------------------------------------------------------------------------------------------------------------------------------------------------------------------------------------------------------------------------------------------------------------------------------------------------------------------------------------------------------------------------------------------------------------------------------------------------------------------------------------------------------------------------------------------------------------------------------------------------------------------------------------------------------------------------------------------------------------------------------------------------------------------------------------------------------------------------------------------------------------------------------------------------------------------------------------------------------------------------------------------------------------------------------------------------------------------------------------------------------------------------------------------------------------------------------------------------------------------------------------------------------------------------------------------------------------------------------------------------------------------------------------------------------------------------------------------------------------------------------------------------------------------------------------------------------------------------------------------------------------------------------------------|
| <b>PROMOTER</b>                | CHR of Reunion Island – Site of CHFG                                                                                                                                                                                                                                                                                                                                                                                                                                                                                                                                                                                                                                                                                                                                                                                                                                                                                                                                                                                                                                                                                                                                                                                                                                                                                                                                                                                                                                                                                                                                                                                                                                                                                                                                                                                                                                                                                                                                                                                                                                                                                                                                                           |
| <b>COORDINATING RESEARCHER</b> | Dr. Xavier COMBES, SAMU 974, CHR of Reunion Island – site of CH Félix Guyon, Route de Bellepierre, 97405 St Denis Cedex                                                                                                                                                                                                                                                                                                                                                                                                                                                                                                                                                                                                                                                                                                                                                                                                                                                                                                                                                                                                                                                                                                                                                                                                                                                                                                                                                                                                                                                                                                                                                                                                                                                                                                                                                                                                                                                                                                                                                                                                                                                                        |
| <b>TITLE</b>                   | Comparison of the usage of succinylcholine and rocuronium for intubation in pre-hospitalization emergencies.<br>CURASMUR                                                                                                                                                                                                                                                                                                                                                                                                                                                                                                                                                                                                                                                                                                                                                                                                                                                                                                                                                                                                                                                                                                                                                                                                                                                                                                                                                                                                                                                                                                                                                                                                                                                                                                                                                                                                                                                                                                                                                                                                                                                                       |
| <b>JUSTIFICATION / CONTEXT</b> | <p>An emergency tracheal intubation is facilitated by the use of sedation. The reference technique links the use of a hypnotic treatment with a depolarising curare of which the onset of action is approximately 60 seconds: succinylcholine. One of the risks associated with an emergency intubation is the occurrence of a difficult intubation, which, when accompanied by ventilation difficulties with the face mask, can lead to the occurrence of hypoxemia. This hypoxemia, if it is profound and prolonged, can lead to cardiac arrest. The spontaneous decurarization that allows for the recovery of effective spontaneous ventilation by the patient is a safety measure. Its delay of occurrence is variable with an average of 8 minutes after injection of a standard dosage of 1mg/kg of succinylcholine, but there is a large inter-individual variability. Rocuronium, which is a non-depolarising curare, is an alternative to succinylcholine, as with a dosage of 1,2mg/kg it allows for equivalent intubation conditions in the same delay of 60 seconds. The challenge presented by the use of rocuronium is that the delay of a spontaneous decurarization after said dosage is prolonged, to as much as one hour. A binding agent for reversal of neuromuscular blockade has recently been made available : sugammadex. An injection of a heavy dosage (16mg/kg) of sugammadex allows for an extremely speedy counteracting of curarization, even very prematurely after the injection of rocuronium. This delay of decurarization is thus 4 minutes long, which is less than the spontaneous delay of decurarization of succinylcholine. The use of rocuronium, which is associated with the potential use of sugammadex in the event of difficult intubation, could thus provide additional safety after emergency sedation, provided that it provides similar intubation conditions to that of succinylcholine. Succinylcholine and rocuronium have never been compared in terms of efficacy and safety of use in terms of intubation in pre-hospitalisation emergency conditions. The tested hypothesis is that intubation in pre-hospitalisation emergency</p> |

|                                   |                                                                                                                                                                                                                                                                                                                                                                                                                                                                                                                                                                                                                      |
|-----------------------------------|----------------------------------------------------------------------------------------------------------------------------------------------------------------------------------------------------------------------------------------------------------------------------------------------------------------------------------------------------------------------------------------------------------------------------------------------------------------------------------------------------------------------------------------------------------------------------------------------------------------------|
|                                   | situations is equally facilitated with the use of rocuronium or succinylcholine.                                                                                                                                                                                                                                                                                                                                                                                                                                                                                                                                     |
| <b>OBJECTIVES</b>                 | The primary objective is to show that the conditions of emergency intubation are not inferior when rocuronium is used, compared to succinylcholine in the context of a rapid sequence induction type sedation.                                                                                                                                                                                                                                                                                                                                                                                                       |
| <b>RESEARCH PLAN</b>              | Multi-centric, non-inferior, randomized, controlled, blind study                                                                                                                                                                                                                                                                                                                                                                                                                                                                                                                                                     |
| <b>INCLUSION CRITERIA</b>         | All older patients in need of sedation for a tracheal intubation in pre-hospitalisation situations                                                                                                                                                                                                                                                                                                                                                                                                                                                                                                                   |
| <b>NON-INCLUSION CRITERIA</b>     | Patients with cardiac arrest, younger patients, pregnant women, patients presenting with a contraindication to the following three medications: rocuronium, succinylcholine, sugammadex, patients that are not members of a medical aid scheme (beneficiary or main member)                                                                                                                                                                                                                                                                                                                                          |
| <b>TREATMENTS OF THE RESEARCH</b> | In the two groups, the induction of the sedation is done after preoxygenation. A hypnotic treatment (etomidate (Hypnomidate®) 0,3 mg.kg-1 or ketamine (Ketamine®) 2 mg.kg-1 injected in the IV line, followed immediately by either the injection of succinylcholine Celocurine®) 1 mg.kg-1, or the injection of 1,2 mg/kg of rocuronium (Esmeron®). The intubation is done 60 seconds after the injection of the curare. If the patient is randomized in the Rocuronium group, the physician in charge has the possibility of reversing the action of the rocuronium by using sugammadex at a dosage of 16 mg/kg    |
| <b>JUDGEMENT CRITERIA</b>         | <b>Primary judgement criterion:</b> Success rate of intubation after the first laryngoscopy<br><b>Secondary judgement criteria:</b> Evaluation of the quality of the direct laryngoscopy, the intubation conditions through the use of the Copenhagen score, measure of global difficulty of the intubation process as evaluated by the intubation difficulty score, evaluation of the need for the use of devices for difficult intubation (long endotracheal tube, Fastrach laryngeal intubation mask and cricothyrotomy), the rate of immediate complications of intubation in terms of the type of curares used. |
| <b>STUDY SIZE</b>                 | 1300 patients are needed. Assuming that the rate of intubation on the first attempt is 75%, 602 (bilateral test) patients per group are needed to show that the rate of intubation on the first attempt is not lower in the test group, compared to the controlled group with a risk of first kind of 0.05, a risk of second kind of 0.2 and an epsilon (maximum acceptable difference of rate of intubation after the first laryngoscopy between the two groups) of 7%. The presence of a safety margin of 10%, of additional inclusions                                                                            |

|                                   |                                                                                                                                                                                                                                                                                                                                                                                                                                   |
|-----------------------------------|-----------------------------------------------------------------------------------------------------------------------------------------------------------------------------------------------------------------------------------------------------------------------------------------------------------------------------------------------------------------------------------------------------------------------------------|
|                                   | linked to the risk of deviations, in relation to protocol associated with the “on the spot” inclusion and randomization of the emergency, induces the need for 650 patients having to be included in each group.                                                                                                                                                                                                                  |
| <b>EXPECTED NUMBER OF CENTRES</b> | 16 centres                                                                                                                                                                                                                                                                                                                                                                                                                        |
| <b>DURATION OF THE RESEARCH</b>   | Duration of the period of inclusion: 3 years<br>Duration of participation for each patient: Duration of pre-hospitalisation care (less than 3 hours)<br>Total duration of the research: 3 years                                                                                                                                                                                                                                   |
| <b>STATISTICAL DATA ANALYSIS</b>  | The clinical equivalence (i.e. non-inferiority) between the percentages of successful intubation will be tested with the aid of the Dunnett and Gent method. The equivalence test will be a unilateral one resting on the hypothesis of a non-inferiority margin $\delta$ of 7%. The analysis will be conducted in per protocol, as recommended for non-inferiority tests, and will be completed with an intent-t-treat analysis. |
| <b>EXPECTED IMPLICATIONS</b>      | Intubation is also facilitated in emergency situations where either rocuronium or succinylcholine is used to perform the curarization of patients.                                                                                                                                                                                                                                                                                |

280

281

---

282

## 2. SCIENTIFIC JUSTIFICATION AND GENERAL DESCRIPTION

283

### 2.1. CURRENT STATE OF KNOWLEDGE

284

#### 2.1.1. PATHOLOGY

285

286

The control of the airways is regularly needed in pre-hospitalisation emergency medical treatment when patients presenting with a vital distress are being treated. Among the various techniques and invasive control systems of airways that are available, tracheal intubation is by far the most frequently used technique, particularly in cases of pre-hospitalisation medical care systems (1, 2).

291

In a country such as France, which is equipped with a pre-hospitalisation medical care system, the epidemiology of tracheal intubation is well known. It is estimated that approximately 8% of primary interventions of the Mobile Emergency Resuscitation Unit (SMUR) will lead to the tracheal intubation of patients being treated. In France, 30% to 45% of intubations performed in pre-hospitalisation medical cases are done on patients in cardio-respiratory arrest. The second group of patients is made up of those having spontaneous cardiac activity after intubation. Among these patients, neurological failure, whether it is linked to a pathology of the central nervous system (Cerebral Vascular Accident, epileptic fit) or whether it be secondary to the ingestion of toxins (voluntary intoxication of psychotropic drugs) is the primary indication of intubation (1-3). The number of intubations performed annually in France by the different SMUR units can be easily estimated. If one considers the fact that in approximately 8% of primary interventions, a tracheal intubation is performed, between 40 000 to 50 000 intubations are performed in France in a non-hospital setting. Setting aside patients intubated for cardiac arrest, sedation is an indispensable element when a tracheal intubation is performed. In fact, once the intubation is performed without any pharmacological sedation, even in patients in a profound coma, difficulty of control of the airways is significant and the failure rate of intubation is higher (4). Various studies have illustrated that the sedation technique in reference to facilitate emergency intubation is rapid sequence intubation (5-7). This technique associates the use of hypnotic treatment and a curare which has an onset delay, and a short duration of action, succinylcholine. The rapid sequence intubation sequence is carried out in the following methods: the patient is pre-oxygenated for 3 minutes, breathing in pure oxygen, thereafter the hypnotic treatment is administered, followed by succinylcholine (1mh/kg). The two hypnotic treatments recommended for emergency situations are hypnomidate (0,3 to 0,4 mg/kg) and ketamine (2 to 3 mg/kg) due to their extremely good hemodynamic tolerance. The difficulty of intubation is similar between the 2 hypnotic treatments (8). Once intubation has been done, a continued sedation is often necessary in order for the patient to adjust to the ventilator.

317

318

319

320

---

---

### 2.1.2. STANDARDS OF CARE AND THE STUDY

Succinylcholine is the curare of reference for emergency intubation as it possesses two essential characteristics: its onset delay is very short, making intubation possible in less than 60 seconds after injection. In emergency situations, the time it takes to create conditions for optimal intubation is a major element of safety. In fact, one should avoid ventilation with a mask for those patients who are all at risk of pulmonary inhalation and the use of rapid onset delay medications shortens the high-risk period that exists between the injection of the hypnotic treatment and the curare, the moment when the intubation tube is correctly inserted into the trachea, and its balloon inflated. The duration of action of succinylcholine is relatively short, about 8 minutes, which allows for the recovery of a rather rapid spontaneous ventilation, should intubation prove to be impossible. However, there is an important unpredictable inter-individual variability and for certain patients, recovery of spontaneous ventilation after the injection of succinylcholine only occurs after 20 minutes (9). In emergency situations, where intubation is impossible and mask ventilation is ineffective, arterial desaturation swiftly becomes the most common occurrence in less than 5 minutes, even if a correct pre-oxygenation was performed before the start of the intubation process (10).

Furthermore, if succinylcholine is for the moment the curare that allows for the fastest intubation in emergency situations, it still presents a few hard and fast side effects and its use is associated with a certain number of undesired effects. The primary side effects of the use of succinylcholine are: hyperkalaemia and situations carrying the risk of hyperkalaemia, myopathies, denervation symptoms (paraplegia, tetraplegia, hemiplegia), eyeball wounds and allergic reactions. The main adverse effects found after the administering of succinylcholine are the following: bradycardia, ventricular arrhythmia, augmentation of kalaemia.

Rocuronium is a curare that has been used for several years. When a standard dosage (0,6 mg/kg) is used, this non-depolarising curare makes it possible to obtain curarization, making intubation possible with a delay of 90 seconds. When the dosage of rocuronium is increased to 1,2 mg/kg, optimal intubation conditions are achieved in the same time period as when succinylcholine is used, in other words, in less than 60 seconds (11-13). There is no hard and fast side effect with the use of rocuronium, other than allergic reactions. The only problem that the administering of a higher dosage (1,2 mg/kg) of rocuronium presents, is the length of induced curarization, which can be around 60 minutes (14). This prolonged curarization presents a potential risk in cases where intubation is impossible, as the patient is unable to resume fast spontaneous ventilation.

Sugammadex is a binding agent for reversal of neuromuscular blockades in particular with rocuronium, which has been studied for many years and placed on the market in 2009. The mode of operation of sugammadex makes it very advantageous compared to other curares. It allows for the reversal of neuromuscular blockades caused by rocuronium without inhibiting acetylcholinesterase, thus avoiding the undesired effects of neostigmine (bradycardia, extrasystoles, bronchoconstriction) and the need to co-administer vagolytic drugs such as atropine. Furthermore, it has been established that sugammadex, when a dosage of 16 mg/kg is

---

---

364 administered, allows for the curarization induced by the rocuronium to be lifted in a very short  
365 delay of 4 minutes (15). This delay of decurarization is significantly lower than the spontaneous  
366 decurarization after the use of succinylcholine. There are no hard and fast side effects with the  
367 use of sugammadex, other than allergic reactions.

368

369 The administering of rocuronium at a dosage of 1,2 mg/kg could thus be an alternative to  
370 the use of succinylcholine, as it has the possibility of counteracting curarization in cases where  
371 intubation is impossible. The use of rocuronium was proposed at the last conference of experts  
372 on emergency sedation as an alternative to the use of succinylcholine, provided that its effects  
373 could be reversed with the use of sugammadex (16). The experts recommended that validation  
374 studies of this practice be carried out.

375 The use of rocuronium could be proposed in place of the use of succinylcholine to perform  
376 intubation in emergency situations, as the side effects and secondary effects of rocuronium seem  
377 to be much less frequent than those found with succinylcholine. Nevertheless, it has not been  
378 shown that rocuronium could allow for intubation in conditions as easily as what succinylcholine  
379 allows in pre-hospitalisation emergency medical treatment.

## 380 2.2. HYPOTHESES OF RESEARCH

381 If it is shown that rocuronium allows for intubation in emergency situations with  
382 conditions not inferior to those produced by succinylcholine, it could be proposed to use  
383 rocuronium as drug of preference, based on its profile of tolerance.

384

## 385 2.3. EXPECTED IMPLICATIONS

386 This research project should allow for the presenting of evidence of the non-inferiority of  
387 rocuronium compared to succinylcholine in rapid sequence intubation of patients with vital  
388 distress. If intubation is equally easy with the use of rocuronium as with succinylcholine,  
389 rocuronium could become the top recommended drug to use in rapid sequence intubation as it  
390 has less adverse secondary effects than succinylcholine. Based on this fact, the results of this  
391 study will have a considerable impact on clinical practices in emergency resuscitation cases.

## 392 2.4. EXPERIENCE OF PARTICIPATING TEAMS ON THIS SUBJECT

393 The medicalization of non-hospital emergencies in France has, after various years, allowed for  
394 quality scientific studies to be done that other countries, in particular North-American countries,  
395 cannot develop. The uniformity of sedations used in pre-hospitalization medical treatment, based  
396 on national recommendations, makes it possible to guarantee a coherence in the French multi-  
397 centric studies carried out by SMUR. The total of SAMU-SMUR research centres of this study have  
398 experience in the conducting of clinical studies in difficult conditions of pre-hospitalisation  
399 medical treatment.

## 400 2.5. FEASIBILITY OF THE STUDY

401 The feasibility of the study relies on the competence of the pilot committee and the previously  
402 mentioned research centres, but also on the capacity of each centre to include a sufficient

---



403 number of RSI with the hopes of achieving the indispensable number of 1300 RSI over 3 years.  
404 The practical survey conducted by each centre regarding the number of RSI by their SMUR in  
405 2001 (Cf. table below) allows one to envisage the inclusion of approximately 450 RSI in one year,  
406 estimating a percentage of inclusion of about 40%.  
407

| Research centres                     | RSI in 2010 |
|--------------------------------------|-------------|
| SAMU 75 (Necker)                     | 100         |
| SAMU 93 (Bobigny)                    | 100         |
| SAMU 92 (Garches)                    | 100         |
| SMUR Beaujon                         | 70          |
| SMUR Lariboisière                    | 50          |
| SMUR Pitié-Salpêtrière               | 50          |
| SMUR Hotel-Dieu                      | 40          |
| SMUR Melun                           | 100         |
| SMUR Gonesse                         | 50          |
| SAMU 974 (Saint Denis de la Réunion) | 80          |
| SAMU 30 (Nîmes)                      | 150         |
| SAMU 59 (Lille)                      | 150         |
| SAMU 21 (Dijon)                      | 100         |
| SAMU 74 (Annecy)                     | 100         |
| SMUR ST Pierre de la Réunion         | 100         |
| SAMU 31 (Toulouse)                   | 200         |
| <b>TOTAL</b>                         | <b>1540</b> |

408

### 409 **3. OBJECTIVES OF THE RESEARCH**

#### 410 3.1. PRIMARY OBJECTIVE

411 The primary objective is to show that the conditions for emergency intubations are not  
412 inferior when rocuronium is used, compared to succinylcholine in the context of a rapid sequence  
413 induction type sedation.

#### 414 3.2. SECONDARY OBJECTIVES

415 The secondary objectives for the evaluation of the efficacy of rocuronium are :

- 416 - To evaluate the quality of direct laryngoscopy, by using the Cormack and Lehane  
417 classification (Annex 1)
- 418 - To measure the global difficulty of the intubation process as evaluated by the intubation  
419 difficulty score (IDS, Annex 2) (17)
- 420 - To characterise the intubation conditions by using the Copenhagen score (Annex 3) (18)
- 421 - To evaluate the need for the use of difficult intubation devices (long endotracheal tube,  
422 Fastrach laryngeal intubation mask and cricothyrotomy)

423

424 A secondary objective evaluates the tolerance of these 2 treatments. It involves the comparison  
425 of the rate of complications observed with the use of rocuronium or succinylcholine.

---

426

427 **4. RESEARCH DESIGN**

428 4.1. RESEARCH PLAN

429 This is a randomized pilot of non-inferiority comparing 2 single-blind treatments (patient). The  
430 administering of succinylcholine leads to the occurrence of fasciculation (small twitch movements  
431 localised mainly on the face and upper part of the thorax), just before curarization. This effect  
432 which has been observed in more than 90% of patients makes it impossible to conduct a double-  
433 blind study in emergencies, as the operator is in fact witness of the occurrence of fasciculations  
434 when succinylcholine is used. In the context of emergencies, particularly pre-hospitalisation ones,  
435 it is not conceivable that the person performing the intubation not be present, at the patient's  
436 side, at the time of administering of succinylcholine. Rocuronium does not cause fasciculation.  
437

438 4.2. METHODS FOR RANDOMIZATION

439 The method to be used will be block randomization, and stratified by centre. Numbered,  
440 opaque and sealed envelopes will be used in each ambulance for the allotment of types of  
441 curares.

442 Randomization is done after the inclusion and exclusion criteria are verified. Each centre will  
443 be allotted a randomization table. The physician is informed of the treatment group  
444 (succinylcholine or rocuronium group) after opening the envelope.  
445

446 **5. CRITERIA FOR ELIGIBILITY**

447 5.1. INCLUSION CRITERIA

448 All adult patients presenting with spontaneous cardiac activity and in need of an endotracheal  
449 intubation, and treated by the SMUR and SAMU participants will be included in the study. These  
450 patients will be treated by senior operators qualified in anaesthesia-resuscitation or emergency  
451 medical care.

452 5.2. NON-INCLUSION CRITERIA

453 The criteria for non-inclusion are:

- 454 ● Patients in cardiac arrest
  - 455 ● Young patients
  - 456 ● Pregnant women
  - 457 ● Presence of a contraindication to succinylcholine:
    - 458 1. Personal or family history of known malignant hyperthermia
    - 459 2. Known allergy to succinylcholine
    - 460 3. Congenital muscular damage
    - 461 4. Myasthenia
    - 462 5. Specific hyperkalaemia
-

- 
- 463 6. Open eye surgery  
464 7. Known congenital deficit in plasma pseudocholinesterases  
465 • Presence of a contraindication to rocuronium: known allergy to rocuronium  
466 • Presence of a contraindication to sugammadex: known allergy to sugammadex  
467 • Patients that are not members of a medical aid scheme (beneficiary or main  
468 member)

469 5.3. RECRUITMENT PROCESS

470

471 Patients will be consecutively recruited among 16 SMUR participants.

472

473 **6. TREATMENTS OF THE RESEARCH**

474 6.1. TREATMENT OF THE STUDY

475 **Rocuronium:** Muscle relaxant medication in the class of curares. Non-depolarizing curare in the  
476 amino steroids family. Vials of 5 to 10 ml (50mg/5ml or 100mg/10ml). The dosage for intubation  
477 outside the context of emergency is 0,6 mg/kg. In order to perform an intubation in less than 60  
478 seconds in the case of a patient considered to be at risk of pulmonary inhalation, the  
479 recommended dosage is 1,2 mg/kg. The drug is administered via direct intravenous route.

480

481 **Sugammadex:** Decurarizing medication allowing for the counteracting of the effects of  
482 rocuronium and vecuronium. Sugammadex encases the curare molecule, thus rendering it  
483 inactive. It does not inhibit acetylcholinesterase, thus avoiding the undesired effects of  
484 neostigmine (bradycardia, extrasystoles, bronchoconstriction) as well as the need to co-  
485 administer vagolytic drugs such as atropine. To counteract a dosage of 1,2 mg/kg of rocuronium,  
486 3 minutes after its injection, one must administer a dosage of 16 mg/kg of sugammadex.  
487 Sugammadex is administered intravenously.

488 6.2. COMPARISON TREATMENT

489 Succinylcholine: muscle relaxant medication in the class of curares. Depolarizing curare that  
490 functions by focusing on the receptors to acetylcholine. Vial of 2 ml (50 mg/ml). The dosage is 1  
491 mg/kg in real weight. The drug is administered intravenously.

492

493 6.3. DESCRIPTION OF THE METHODS OF USE OF MEDICATION

494 With regard to succinylcholine and rocuronium, they are administered in the context of a rapid  
495 sequence intubation procedure. In both groups, induction of sedation is done after  
496 preoxygenation. A hypnotic drug (etomidate (Hypnomidate®) 0,3 mg.kg-1 of estimated weight or  
497 ketamine (Ketamine®) 2 mg.kg-1 of estimated weight is injection in IV, followed immediately  
498 either by the injection of succinylcholine (Célocurine®) 1 mg.kg-1 of estimated weight in IV, or by  
499 the injection of 1,2 mg/kg of rocuronium (Esmeron®). The Sellick manoeuvre (cricoid pressure in

---

---

500 order to limit the risk of pulmonary inhalation) is systematically used according to standard  
501 recommendations. The intubation is done 60 seconds after the injection of the curare.

502

503 If the patient is randomized in the Rocuronium group, the physician in charge has the possibility  
504 of reversing the action of rocuronium by using sugammadex, at a dosage of 16 mg/kg. Reversal of  
505 the neuromuscular blockades is done in patients who cannot be intubated through direct  
506 laryngoscopy and cannot be neither intubated nor ventilated using alternative techniques for  
507 difficult intubation as recommended by the national expert conference on intubation, which are  
508 the long endotracheal tube or the laryngeal intubation mask (21). This situation, based on the  
509 medical literature that has already been published, has the likelihood of occurrence that is lower  
510 than 1% (1, 2, 8, 19, 20, 22).

#### 511 6.4. DESCRIPTION OF ALL MEDICATION USED FOR THE PURPOSES OF RESEARCH OTHER 512 THAN THE MEDICATION THAT FORMS THE SUBJECT OF THE RESEARCH

513 A maintenance sedation is done with the association of midazolam (initial dosage of 0,1 mg.kh-  
514 1.h-1) and of fentanyl (2 to 5 µg.kg-1.h-1) or of sufentanil (0,2 to 0,5 µg.kg-1.h-1). In the event of  
515 inadequate sedation, the use of a supplementary sedation is left to the discretion of the clinician  
516 and will be arranged.

517 The nature and dosage of products used will be noted in the observation notebook. In the same  
518 manner, the usage of filling solutions will be logged in the observation notebook if necessary. In  
519 the event of an adverse incident or effect, the tubes required will be specific to the type of  
520 accident and logged in the observation notebook.

#### 521 6.5. PRODUCT PIPELINE

522 Bearing in mind the fact that the test will be done pre-hospitalisation, and in emergency situations, the  
523 medication will be available in each ambulance and provided by pharmacies for internal use for each  
524 participating centre.

### 525 7. ASSOCIATED TREATMENTS/PROCEDURES

#### 526 7.1. AUTHORIZED ASSOCIATED TREATMENTS/PROCEDURES

527 Apart from the randomization affecting the choice of curare that will be used, all other associated  
528 treatments will be done according to the usual recommendations and practices. Notably, in the  
529 event of hemodynamic occurrences of the hypotension type, the treatment of this secondary  
530 effect will call for a vascular filling using crystalloids and ephedrine. A prolonged hypotension will  
531 be treated with the continued administration of catecholamines. The sedation treatment  
532 following the intubation will be done according to the recommendations and will associate a  
533 benzodiazepine (midazolam) and morphine type (fentanyl or sufentanil) but other hypnotics were  
534 allowed. The dosages of these agents will be adapted by the physician in charge, based on the  
535 clinical condition of the patient and to the objectives of the sedation which vary, based on the  
536 pathology and the indication of mechanical ventilation. If the patient is randomized in the  
537 Rocuronium group, the physician in charge has the possibility of reversing the actions of  
538 rocuronium by using sugammadex at a dosage of 16 mg/kg. The action of reversing is brought

---

---

539 about for patients who cannot be intubated through direct laryngoscopy and who cannot be  
540 neither intubated nor ventilated using alternative techniques for difficult intubation, as  
541 recommended by the national expert conference on intubation, which are the long endotracheal  
542 tube or the laryngeal intubation mask.

543 7.2. PROHIBITED ASSOCIATED TREATMENTS/PROCEDURES

544 Apart from the randomization on the choice of curare used for the induction of sedation, there is  
545 no change to the usual practices. There is thus no treatment or associated procedures that are  
546 prohibited for this research.

547 **8. JUDGMENT CRITERIA**

548 8.1. PRIMARY JUDGMENT CRITERION

549 Proportion of successful intubation after the first laryngoscopy

550 8.2. SECONDARY JUDGMENT CRITERIA

551 Distribution of Cormack and Lehane classification grades (Annex 1) in the 2 treatment groups. The  
552 intubation difficulty score (IDS, Annex 2) (17) in the 2 treatment groups. Copenhagen Score (Annex 3) (18)  
553 in the 2 treatment groups. Proportion of the use of devices for difficult intubation (long endotracheal  
554 tube, Fastrach laryngeal intubation mask and cricothyrotomy) in the 2 treatment groups.

555

556 Tolerance

557 To evaluate the rate of immediate complications (first 15 minutes) of intubation based on the type of  
558 curare used: arterial hypotension, troubles with cardiac rhythm, cardiac arrest, pulmonary inhalation,  
559 occurrence of arterial hypoxemia episodes, allergic reaction.

560 **9. PROGRESS OF THE RESEARCH**

561 9.1. TIMELINE FOR RESEARCH

562 – Start of inclusions: 4<sup>th</sup> trimester of 2012

563 – Duration of period of inclusion: 3 years

564 – Duration of participation for each patient: duration of their pre-hospitalisation admission (less  
565 than 3 hours)

566 – Total duration of the research: 4 years

567 9.2. SUMMARIZED TABLE OF PATIENT MONITORING

568

569

|                                                                 | Selection and inclusion |
|-----------------------------------------------------------------|-------------------------|
|                                                                 | J0 Visit                |
| Verification of inclusion criteria – non-inclusion, Information | X                       |
| Information - Consent                                           | *                       |

---

---

|                      |   |
|----------------------|---|
| Randomization        | X |
| Treatment            | X |
| Clinical examination | X |

570

571

572

573

\* Collection of consent of relatives if they are present as well as that of the patient once this is possible, once the patient is awake and able to give consent.

574  
575  
576  
577  
578  
579  
580  
581  
582  
583  
584  
585  
586  
587  
588  
589  
590  
591  
592  
593  
594  
595  
596  
597  
598  
599  
600  
601  
602  
603  
604  
605  
606  
607  
608  
609  
610  
611

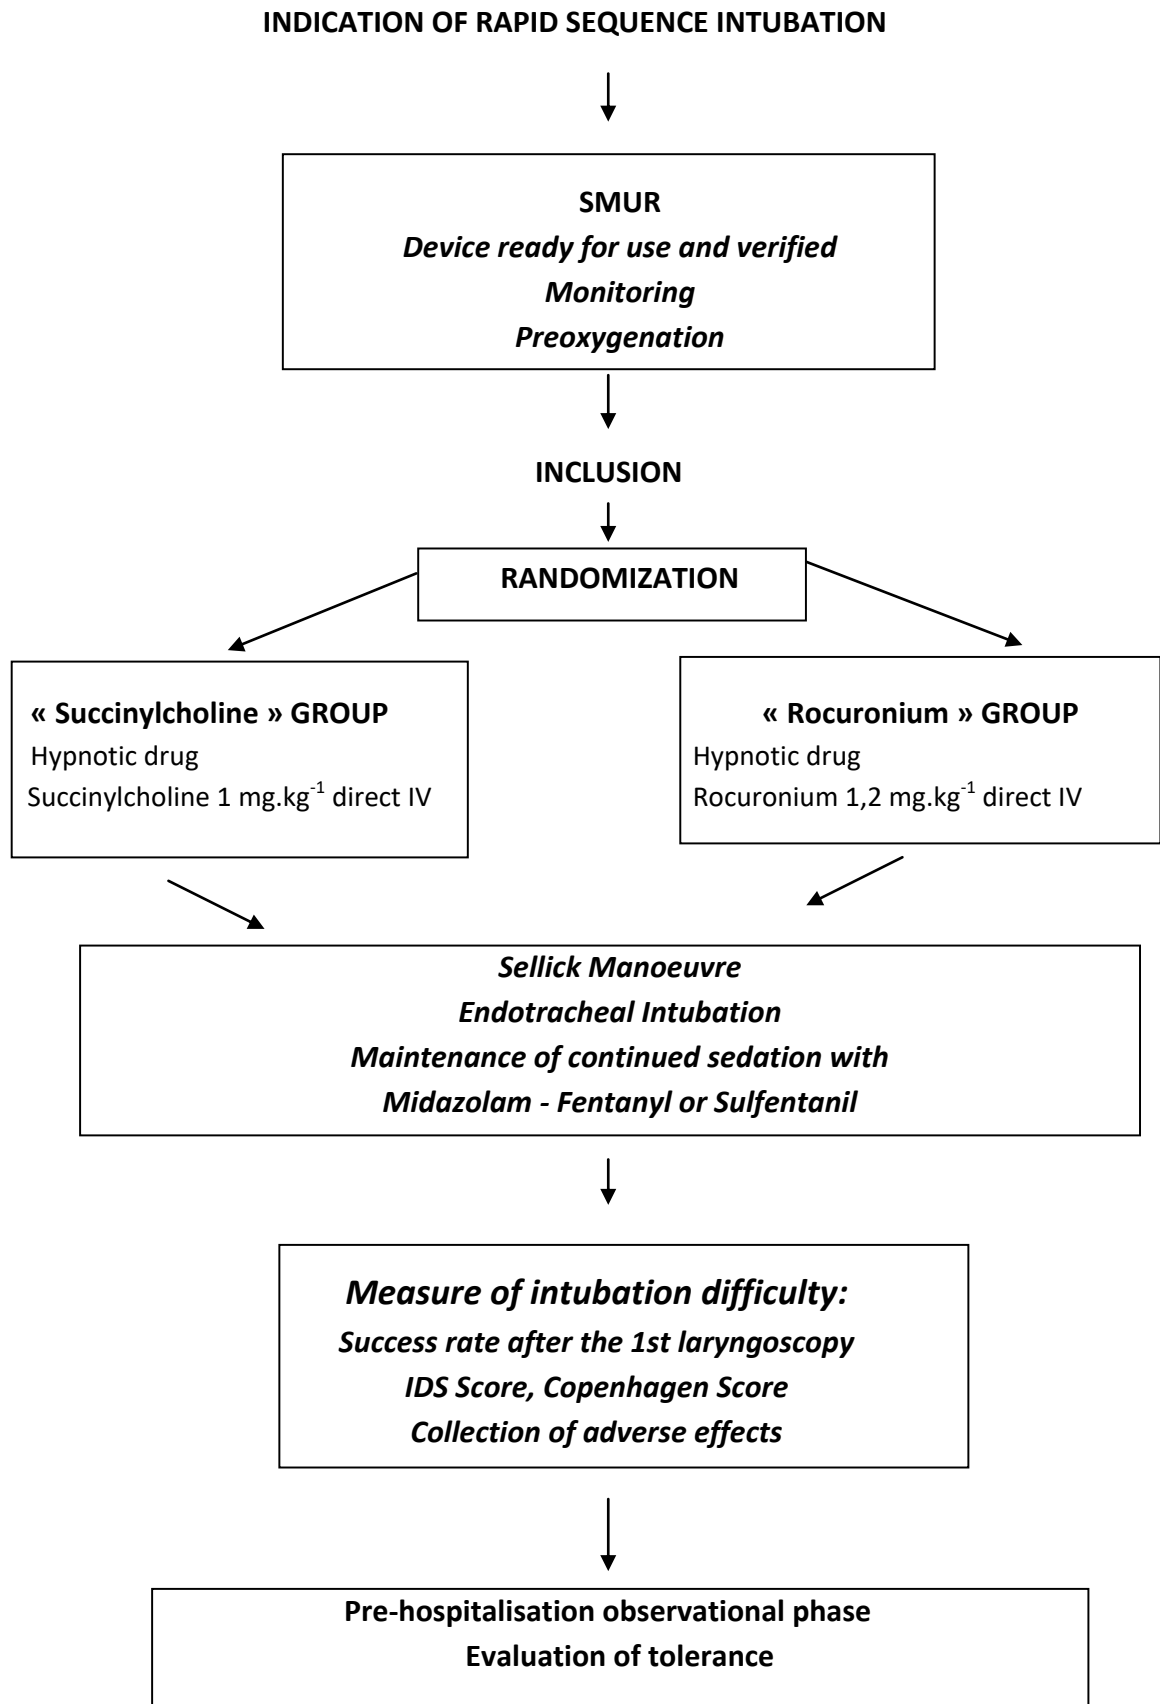

612  
613  
614  
615

### 9.3. INFORMATION AND COLLECTION OF CONSENT

Bearing in mind the inclusion of patients in emergency situations, it would not be possible to put into place the standard process of prior oral and written information, time for reflection after the formalised consent of the person availing themselves for research. The consent of this

---

616 person will not be sought and only the consent of family members will be requested if they are  
617 present, and as default, the advice of the support person.

618 The patient will be informed and his/her consent will be requested for the tracking of the  
619 research, after extubation at the hospital and recovery from the neurological state allowing this  
620 collection. For patients who were included and are deceased prior to hospitalisation, consent will  
621 be sought from their relatives if the latter are present.  
622

#### 623 9.4. RANDOMIZATION METHODOLOGY

624 The method to be used will be a block randomization, and stratified by centre. Numbered,  
625 opaque and sealed envelopes will be used in each ambulance for the allotment of types of  
626 curares.

627 Randomization is done after verification of the inclusion and exclusion criteria. Each  
628 centre will have their own table of randomization allocated to them. The physician is informed of  
629 the treatment group (succinylcholine or rocuronium group) after opening the envelope.

#### 630 9.5. INCLUSION

631

632 The clinical data and immediate complications will be collected at J0, during the  
633 prehospitalisation admittance phase.

634 An observation notebook is filled by the researcher of prehospitalisation intervention. The  
635 medical data collection sheet will compile:

- 636 – The randomization, the date, time, initials of the patient, the physician involved
- 637 – The condition of the patient prior to being admitted, and his/her medical history
- 638 – Clinical data: hemodynamic state, neurological state, respiratory state
- 639 – His/her estimated weight and height
- 640 – The intubation conditions
- 641 – The necessary parameters for the calculation of the IDS and the Copenhagen score  
642 (annexes 2 and 3)
- 643 – Treatments administered for intubation: type (hypnotic, morphine-type) and  
644 dosage used
- 645 – Complications occurring after intubation

646

647 There will be no specific examination or act conducted during the pre-hospitalisation or  
648 during the hospitalisation phase.  
649

#### 650 9.6. RULES FOR CESSATION OF RESEARCH

651 The reasons for and date of premature release date of the study need to be noted in the  
652 observation notebook of the patient in question (e.g. withdrawal of patient consent, adverse  
653 events of a serious nature, etc.).

---



---

654

## **10. MANAGEMENT OF ADVERSE EVENTS AND NEW FACTS**

655

### 10.1. DEFINITIONS

656

**Adverse event** (Article R.11223-39 of the Public Health Code)

657

Any untoward medical occurrence in a person participating in a biomedical trial, whether this occurrence is linked or not to the research or the product on which research is being carried out.

658

659

660

**Serious adverse event** (Article R.1123-39 of the Public Health Code and the ICH E2B guide)

661

Any adverse event which:

662

✓ causes death,

663

✓ puts the life of the person participating in the research in danger

664

✓ requires hospitalisation or extension of hospitalisation

665

✓ causes a disability or serious or lasting handicap

666

✓ is reflected by an anomaly or congenital abnormality

667

✓ or any event considered medically serious

668

And which requires medication, no matter the dose administered.

669

670

The expression “to put a life in danger” is used to refer to an immediate vital threat, at the time of the adverse event, irrespective of the consequences that corrective or palliative therapy might have.

671

672

Certain circumstances requiring hospitalisation do not carry the criteria of seriousness in terms of “hospitalisation” such as:

673

- admission for social or administrative reasons,

674

- hospitalisation predefined by protocol,

675

- hospitalisation for medical treatment or planned surgery prior to the research,

676

- Day visit to the hospital.

677

678

**Unexpected adverse effect** (article R.1123-39 of the public health code)

679

Any adverse effect of the product of which the nature, severity or evolution does not match the information appearing in the opinion request files to the CPP and demand for authorisation from the competent authority.

680

681

**New factor** (decree of 24 May 2006)

682

New safety data, able to lead to a re-evaluation of the report of the benefits and risks of the research, or which could be sufficient to envisage modifications to the documents related to the research, of how the research is conducted as well as, in the case of failure, the use of the product.

683

684

### 10.2. DESCRIPTION OF EXPECTED SERIOUS ADVERSE EVENTS

685

The following serious adverse events are expected:

---

- 
- 694 - Linked to the treatment of the study: Serious allergic reaction: bronchospasm,
  - 695 hypotension
  - 696 - Linked to the evolution of the illness:
  - 697 - State of shock
  - 698 - Hypoxemia
  - 699 - Pulmonary inhalation
  - 700 - Cardiac arrest
  - 701

702 10.3. PROCESS TO FOLLOW IN THE EVENT OF AN ADVERSE EVENT OR NEW FACTORS

703 The researcher evaluates each adverse event based on its gravity. He should inform the  
 704 promoter, without delay from the day when he learns of it, of any serious adverse event or new  
 705 factor, should these occur:

- 706 - from the date that the consent form was signed
- 707 - throughout the foreseen duration of monitoring of the patient for research
- 708 - up until 3 days after the foreseen end of monitoring of the participant for research, once
- 709 it is subject to be ascribed to research
- 710 - Without limitation of duration once it is subject to be ascribed to experimental
- 711 treatment.
- 712

| TYPE OF EVENT          | NOTIFICATION METHODS                                       | DELAY OF NOTIFICATION OF PROMOTER         |
|------------------------|------------------------------------------------------------|-------------------------------------------|
| UE that is not adverse | In the observation notebook                                | No immediate notification                 |
| Expected SAE           | Initial EIG declaration form + written report if necessary | <b>Immediate notification of promoter</b> |
| Unexpected SAE         | Initial EIG declaration form + written report if necessary | <b>Immediate notification of promoter</b> |
| New factor             | Declaration form + written report if necessary             | <b>Immediate notification of promoter</b> |

713  
714  
715  
716  
717  
718  
719  
720  
721  
722

**DRCI of Reunion Island CHR**  
**Tel.: 02 62 35 95 25**  
**Fax: 02 62 35 97 21**  
**mail: [vanessa.basque@chr-reunion.fr](mailto:vanessa.basque@chr-reunion.fr)**

All these events need to be monitored up until the **complete resolution**. An information supplement (complementary declaration note) regarding the evolution of the event, if it is not mentioned in the first report, will be sent to the sponsor by the researcher.

723 10.4. DECLARATION AND REGISTRATION OF UNEXPECTED SAE AND NEW FACTORS

724 The sponsor/safety unit declares, according to the existing delays, the unexpected SAE and new  
 725 factors occurring in the course of the research:

---

- 
- 726 - to Afssaps,  
727 - to the relevant Institutional Review Board (CPP). The board assures, if necessary, that the  
728 subjects participating in the research have been informed of adverse effects and that they  
729 confirm their consent.

730 The sponsor/safety unit registers all unexpected SAE in the EudraVigilance database.

#### 731 10.5. ANNUAL SAFETY REPORT

732 On the anniversary date of the authorisation of the research, the sponsor edits a safety report  
733 comprising of:

- 734 - the list of susceptible serious adverse effects that are linked to experimental medication  
735 of the research, including the expected and unexpected adverse effects,
- 736 - A concise and critical analysis of the safety of participants availing themselves for  
737 research.

738

739 This report is sent to the Afssaps and the IRB in the 60 days following the anniversary date of the  
740 authorisation of the research.

741

### 742 11. STATISTICAL ASPECTS

#### 743 11.1. CALCULATION OF THE STUDY SIZE

744 In pre-hospitalisation medical treatment, once intubation is performed using a rapid sequence  
745 induction technique, the rate of successful intubation after the first laryngoscopy varies from 70  
746 to 80% in the different studies published (1, 6, 19, 20).

747

748 Assuming that the rate of intubation at the first attempt is 75%, we have estimated the sample  
749 size to be 602 patients, per group, to show that the rate of intubation upon first attempt is not  
750 lower in the test group as compared to the controlled group. This subject number has been  
751 determined by making the hypothesis of an acceptable maximum difference of intubation rate  
752 after the first laryngoscopy between the two groups of 7% (normally fixed margin for this criteria)  
753 (20) to the unilateral risk  $\alpha$  of 0.025 (23) and to a risk of second type of 0.2. A safety margin of  
754 about 10% of additional inclusions linked to the risk of deviations relative to the protocol with  
755 respect to the inclusion "on the field" and the randomization in emergency induces the need to  
756 include 650 patients in each group.

757

#### 758 11.2. DESCRIPTIVE ANALYSIS

759 All the quantitative parameters will be summarized in a descriptive manner in each  
760 therapeutic modality group, and for each time that they are collected. The descriptive statistical  
761 analysis will, for each quantitative parameter at every time, be composed of: means, standard  
762 deviation, minimum, maximum, median and quartiles, number of missing values. The qualitative  
763 parameters will be illustrated by the frequency of distribution and bilateral confidence ranges to  
764 95% associated ones.

---

---

765 11.3. STATISTICAL TESTS

766 **Univariate analysis**

767 The Student t-test or Mann-Whitney test will be used to compare the quantitative variables  
768 according to the conditions of applications. The comparisons of proportions will be done with the  
769 use of the Chi2 test or the Fisher exact test, according to the conditions of applications.  
770

771 11.4. PRIMARY CRITERION OF EFFICACY: FREQUENCY OF SUCCESSFUL INTUBATION

772 In the case of a clinical test of non-inferiority, where  $\Delta I$  is the threshold value of the margin of  
773 clinical non-inferiority, the null and alternative hypotheses can be formulated as illustrated below  
774 (24):

775 For the proportions (i.e. primary criterion of proportion of successful intubation)

776  $H_0 : \Pi_1 - \Pi_2 < -\Delta I$

777 Against an alternative hypothesis

778  $H_a : \Pi_1 - \Pi_2 \geq -\Delta I$

779 With  $\Pi_1$ , the proportion of successful intubation after the first laryngoscopy in the rocuronium  
780 group

781 And  $\Pi_2$ , the proportion of successful intubation after the first laryngoscopy in the succinylcholine  
782 group.

783 The clinical equivalence (i.e. non-inferiority) between the percentages of successful intubation  
784 will be tested using the Dunnett and Gent method (25). The equivalence test will be a unilateral  
785 test based on the hypothesis of a non-inferiority margin  $\delta$  of 7%. The unilateral confidence range  
786 at 97.5% (23) of the difference of the percentages of successful intubation will be equally  
787 calculated using the Wald method. This method allows for a type I error control in the context of  
788 non-inferiority (26). The analysis will be done as per protocol, as recommended by the non-  
789 inferiority tests, and completed with an intent-to-treat analysis. The statistical analysis will be  
790 done with the use of SAS 9.2 software (SAS Institute Inc).

791 11.5. SECONDARY CRITERIA

792 The quantitative variables will be compared through the Student t-test for the Gaussian  
793 variables and through the Mann-Whitney test for non-Gaussian variables. The qualitative  
794 variables will be compared using the Chi-2 test. In the case of Chi-2 non-validity, a Fisher exact  
795 probability test will be used. The risk of first type has been fixed at 5%. All tests will be bilateral.  
796

797 11.6. STUDY POPULATIONS

798 Population per protocol (PP) : patients having followed the protocol without any major violation.  
799 The criteria corresponding to major violations will be determined after a committee meeting on  
800 the monitoring of the test. Any classification of a violation having occurred in the course of the  
801 test will be done in blind treatment.  
802

803 Population to be treated (ITT): This is an ensemble of randomized patients (intent-to-treat  
804 analysis).

---

---

805

806 The conclusion of non-inferiority requires the coherence of analyses done on the populations ITT  
807 and PP. In the event of a missing value on the primary criterion, the patient will be classified as  
808 having failed. The analyses of difference will be done on population ITT.

809 11.7. INTERIM ANALYSIS

810 There is no interim analysis foreseen.

811 11.8. DATA ANALYSIS AND GROUPWARE CONTROLLER

812 The full analysis will be done by the Methodological Support Unit of the CHR of Reunion Island.  
813 The full analysis will be done using SAS software (version 9.2; SAS Institute Inc, Cary, North  
814 Carolina).  
815

816 **12. RESEARCH MONITORING**

817 12.1. PILOT COMMITTEE

818 The committee is made up by the study coordinator (Dr. Xavier Combes), the statistician, the  
819 methodologist, the project leader and the main researcher in charge of each participating centre:

- 820 • Pr. Frédéric ADNET
- 821 • Dr. Xavier COMBES
- 822 • Dr. François DOLVECK
- 823 • Dr. Patricia JABRE
- 824 • Dr. Agnès RICARD-HIBON
- 825 • Pr. Marc FREYSZ
- 826 • Dr. Karim TAZAROURTE
- 827 • Dr. Dominique SAVARY
- 828 • Dr. Patrick ECOLLAN
- 829 • Dr. Papa GUEYE
- 830 • Dr. Gérald KIERZEK
- 831 • Dr. Jean Louis SEBBAH
- 832 • Pr. Jean Emmanuel DE LA COUSSAYE
- 833 • Pr. Eric WIEL
- 834 • Dr. Arnaud BOURDE

835 12.2. INDEPENDENT MONITORING COMMITTEE

836 The Independent Monitoring Committee of serious adverse events will be responsible for  
837 assessing said events or any unexpected events occurring during the study.

838 This committee will be composed of 3 members, all appointed by the sponsor in agreement  
839 with the coordinating researcher. They will meet after the inclusion of 25, 50 and 75% of  
840 patients.

841 Their role will be that of assessing the safety problems linked to the study (in particular, the  
842 potential difference in the frequency of intubation difficulty in the two groups) and will either

---

---

843 recommend that the study be halted or continued. All serious adverse events will be reported to  
844 this committee, who will also be requested to make a ruling in the event of an occurrence of one  
845 or more unexpected events, but also in the event of an increased frequency of an adverse event.  
846

847 **13. SOURCE RIGHT OF ACCESS TO DATA AND SOURCE DOCUMENTS**

848 13.1. ACCESS TO DATA

849 The sponsor is responsible for obtaining the agreement of all parties involved in the research, in  
850 order to guarantee direct access to all the sites where the research will be carried out, access to  
851 source data, to source documents and to the reports for the purposes of quality control and  
852 auditing by the sponsor.

853 The researchers will make the documents and individual data that are strictly necessary for the  
854 monitoring, quality control and audit of the biomedical research, available to all persons having  
855 access to these documents, in accordance to the current legislative and regulatory provisions  
856 (Articles L.1121-3 and R.5121-13 of the Public Health Code).

857 13.2. SOURCE DATA

858 Any document or original object that allows for the proof of the existence or accuracy of data or  
859 fact registered in the course of the research is defined as a source document.  
860

861 13.3. DATA CONFIDENTIALITY

862 In accordance to the current legislative provisions (Articles L.1121-3 and R.5121-13 of the Public  
863 Health Code) all persons having access to source data will take all necessary precautions with the  
864 goal of ensuring the confidentiality of information relating to experimental medication, to  
865 research, to the persons participating in the research, particularly with regard to their identity  
866 and the results obtained. These persons, in the same way as the researchers themselves, are  
867 submitted to professional confidentiality.  
868

869 During the biomedical research or at its publication, the data collected on participating  
870 individuals and sent to the sponsor by the researchers (or any other specialised participants) will  
871 be rendered anonymous. The data should in no way make the names or addresses of the  
872 participating individuals public.  
873

874 The patients will be coded with the use of a unique number for the research indicating their order  
875 of inclusion, the centre and their initials.  
876

877 The sponsor will ensure that each person participating in the research has given their written  
878 consent for access to individual data relating to them and which are strictly necessary for quality  
879 control of the research.

---

---

880

## **14. QUALITY ASSURANCE AND CONTROL**

### 881 14.1. INSTRUCTIONS FOR DATA COLLECTION

882 All information required by protocol needs to be logged in the observation notebooks and an  
883 explanation needs to be provided for each missing data. The data need to be collected  
884 progressively as they are obtained, and transcribed in these notebooks in a neat and legible  
885 manner.

886 Any incorrect data captured in the observation notebooks will be clearly crossed out and the new  
887 data will be entered, next to the crossed-out information, accompanied by initials, the date and  
888 possibly an explanation by the researcher or authorised person who will have done the  
889 correction.

890

891 The data is captured in a hard copy observation notebook during pre-hospitalisation, then later  
892 captured in an electronic observation notebook.

### 893 14.2. RESEARCH MONITORING

894 The monitoring of the research will be guaranteed by the coordinating researcher, in conjunction  
895 with a clinical research technician who will be in charge of :

- 896 - capturing data in the electronic observation notebook
- 897 - verifying that the observation notebook is kept up to date (request for additional  
898 information, corrections, ...),
- 899 - the logistics and monitoring of the research
- 900 - publishing reports regarding its progress level,
- 901 - Transmission of SAE to the sponsor.

902 He will carry out his work in accordance to the standardised operational procedures, in  
903 collaboration with the clinical research director appointed by the sponsor.

### 904 14.3. QUALITY CONTROL

905 A clinical research director mandated by the sponsor will regularly visit each research centre,  
906 once or a few times during the course of the research as per the rate of inclusions and for the  
907 purposes of research. During these visits, the following elements will be reviewed:

- 908 ➤ clear consent,
- 909 ➤ respect of the research protocol and the procedures defined by it,
- 910 ➤ quality of data collected in the observation notebook : accuracy, missing data, coherence  
911 between data and source documents (medical dossiers, appointment books, original copies of  
912 laboratory results, etc., ...),
- 913 ➤ Management of future proceeds.

914 Each visit will be done for the purposes of monitoring with a report written up.

### 915 14.4. MANAGEMENT OF DATA

916 Data will be entered onto a paper form by the emergency physician immediately after the intubation.  
917 Then, an electronic entry will be done by a clinical research technician.

918

---

---

919           14.5.   AUDIT AND INSPECTION

920   An audit can be carried out at any point by the persons authorised by the sponsor and  
921   independent persons from the heads of research. The goal is to ensure the quality of the  
922   research, the validity of its results and that there is compliance to the law and current  
923   regulations.

924

925   The researchers agree to comply to the demands of the sponsor and those of the relevant  
926   authority with regard to an audit or inspection of the research.

927

928   The audit could be applicable to all stages of the research, the development of protocol for the  
929   publication of results and to the classification of data used or produced in the framework of the  
930   research.

931           **15. ETHICAL AND REGULATORY CONSIDERATIONS**

932   The promoter and the researcher(s) are committed to ensuring that this research is carried out in  
933   accordance to Act n° 2004-806 of 9 August 2004, as well as in agreement with the Good Clinical  
934   Practices (I.C.H. version 4 of 1<sup>st</sup> May 1996 and the decision of 24 November 2006) and the  
935   Helsinki declaration (of which the full version can be found on the website <http://www.wma.net>).

936   The research is carried out in accordance with the current protocol.

937

938   This research has received the favourable opinion of the CPP (Institutional Review Board) of the South-  
939   West Overseas III region, and the authorization of the *Afssaps*.

940

941

942   The CHR (university health centre) of Reunion Island, sponsor of this research, has underwritten  
943   an insurance contract in civil liability alongside SHAM in accordance with the provisions of Article  
944   L1121-10 of the Public Health Code.

945

946   The data registered at the time of this research are subject to computer processing at the CHR of  
947   Reunion Island, with due regard to the Act n° 78-17 of 6 January 1978 related to Information  
948   Technology, Data Files and Civil Liberties, modified by Act 2004-801 of 6 August 2004.

949

950   This research falls within the framework of “Reference Methodology” (MR-001) pursuant to the  
951   provisions of Article 54 paragraph 5 of the Act of 6 January 1978, modified and related to  
952   Information Technology, Data Files and Civil Liberties. This change has been approved by the  
953   decision of 5 January 2006. The CHR of Reunion Island has signed a compliance undertaking to  
954   this “Reference Methodology”.

955

956   This research is logged in the EudraCT European data base under number *log number* in  
957   accordance with Art. L1121.15 of the public health code.

958

959   This research is logged on the website <http://clinicaltrials.gov/>

960

---



---

961 AMENDMENT TO PROTOCOL

962 Any substantial modification, that is, any modification of a nature that it would have a significant  
963 impact on the protection of persons, on the conditions of validity and the research results, on the  
964 quality and safety of experimented products, on the interpretation of scientific documents that  
965 support the progress of the research or on the modalities of conduct of said research, is subject  
966 to a written amendment that is sent to the sponsor; the sponsor should obtain, prior to its  
967 implementation, a favourable opinion of the IRB and the authorization of the Afssaps.

968

969 All non-substantial modifications, that is, those that do not have a significant impact on any  
970 aspect of the research, regardless of what it is, are communicated to the IRB (CPP) for  
971 information purposes.

972

973 All amendments are validated by the sponsor, and by all research participants affected by the  
974 modification, before submission to the IRB (CPP) and the Afssaps. This validation might require a  
975 meeting between the CS and/or the CIS.

976

977 All amendments to the protocol need to be communicated to all participating researchers. The  
978 researchers are committed to respecting the contents.

979

980 Any amendment that affects the admission of patients or the benefits, risks and limitations of the  
981 research are subject to a new briefing note and a new consent form of which the collection  
982 follows the same procedure as the aforesaid ones.

983 **16. STORING OF DOCUMENTS AND DATA RELATED TO THE RESEARCH**

984 The following documents related to this research are archived as defined in the Good Clinical  
985 Practices:

986 – By the researching physicians :

987 **- for a period of 15 years following the conclusion of the research**

- 988 • The protocol and potential amendments to the protocol  
989 • The observation notebooks (copies)  
990 • The source dossiers of patients that have signed consent  
991 • Any other documents and mail related to the research

992 **- for a period of 30 years following the conclusion of the research**

- 993 • The original copy of signed, clear consent forms of participants

994 All these documents are the responsibility of the researcher during the regulatory  
995 archiving period

996

997 – By the sponsor:

998 **- for a period of 15 years following the conclusion of the research**

- 999 • The protocol and potential amendments to the protocol  
1000 • The original copies of observation notebooks
-

- 
- 1001                                   • Any other documents and mail related to the research  
1002
- 1003                           **- for a period of 30 years following the conclusion of the research**  
1004                                   • A copy of the signed, clear consent forms of participants  
1005                                   • Documents relating to serious adverse events
- 1006                           All these documents are the responsibility of the sponsor during the regulatory  
1007                           archiving period.  
1008
- 1009                           No relocation nor destruction can be done without the sponsor’s agreement. In terms of the  
1010                           regulatory archiving period, the sponsor needs to be consulted for destruction. All data,  
1011                           documents and reports could be subject to an audit or inspection.

1012                           **17. RULES REGARDING PUBLICATION**

1013                           17.1. SCIENTIFIC PAPERS

1014                           The analysis of data provided by the research centres is done by the Methodological Support Unit  
1015                           of the CHR of Reunion Island. This analysis gives rise to a written report which is to be submitted  
1016                           to the sponsor, who will forward it to the Institutional Review Board (CPP) and the relevant  
1017                           authority.  
1018

1019                           All written or oral communication of the research results need to have the prior consent of the  
1020                           coordinating researcher and, failing which, that of the committee established for the research.  
1021

1022                           The publication of primary results indicate the name of the sponsor, of all researchers having  
1023                           included or monitored patients in the research, of methodologists, of the project leader, of the  
1024                           biostatistician and data manager that participated in the research, the members of the  
1025                           committee which has been established for the research and source of funds. The International  
1026                           Rules for writing and publishing (*The Uniform Requirements for Manuscripts* du ICMJE, April 2010)  
1027                           will be taken into consideration.

1028                           17.2. COMMUNICATION OF RESULTS TO PATIENTS

1029                           In accordance with Act n°2002-303 of 4 March 2002, patients are informed, on their request, of  
1030                           the overall research results.

1031                           17.3. TRANSFER OF DATA

1032                           The collection and management of data are ensured by the Methodological Support Unit of the  
1033                           CHR of Reunion Island. The conditions for transfer of all or part of the database of the research  
1034                           are determined by the sponsor of the research and are subject to a written contract.

---

---

1035 **BIBLIOGRAPHY**

1036

- 1037 1. Combes X, Jabre P, Jbeili C, et al. Prehospital standardization of medical airway  
1038 management: incidence and risk factors of difficult airway. *Acad Emerg Med* 2006;13(8):828-34.
  - 1039 2. Adnet F, Jouriles NJ, Le Toumelin P, et al. Survey of out-of-hospital emergency intubations  
1040 in the French prehospital medical system: a multicenter study. *Ann Emerg Med* 1998;32(4):454-  
1041 60.
  - 1042 3. Ricard-Hibon A, Chollet C, Belpomme V, Duchateau FX, Marty J. Epidemiology of adverse  
1043 effects of prehospital sedation analgesia. *Am J Emerg Med* 2003;21(6):461-6.
  - 1044 4. Adnet F, Borron SW, Finot MA, Lapandry C, Baud FJ. Intubation difficulty in poisoned  
1045 patients: association with initial Glasgow Coma Scale score. *Acad Emerg Med* 1998;5(2):123-7.
  - 1046 5. Adnet F, Minadeo JP, Finot MA, et al. A survey of sedation protocols used for emergency  
1047 endotracheal intubation in poisoned patients in the French prehospital medical system. *Eur J*  
1048 *Emerg Med* 1998;5(4):415-9.
  - 1049 6. Ricard-Hibon A, Chollet C, Leroy C, Marty J. Succinylcholine improves the time of  
1050 performance of a tracheal intubation in prehospital critical care medicine. *Eur J Anaesthesiol*  
1051 2002;19(5):361-7.
  - 1052 7. Rose WD, Anderson LD, Edmond SA. Analysis of intubations. Before and after  
1053 establishment of a rapid sequence intubation protocol for air medical use. *Air Med J* 1994;13(11-  
1054 12):475-8.
  - 1055 8. Jabre P, Combes X, Lapostolle F, et al. Etomidate versus ketamine for rapid sequence  
1056 intubation in acutely ill patients: a multicentre randomised controlled trial. *Lancet*  
1057 2009;374(9686):293-300.
  - 1058 9. Heier T, Feiner JR, Lin J, Brown R, Caldwell JE. Hemoglobin desaturation after  
1059 succinylcholine-induced apnea: a study of the recovery of spontaneous ventilation in healthy  
1060 volunteers. *Anesthesiology* 2001;94(5):754-9.
  - 1061 10. Benumof JL, Dagg R, Benumof R. Critical hemoglobin desaturation will occur before return  
1062 to an unparalyzed state following 1 mg/kg intravenous succinylcholine. *Anesthesiology*  
1063 1997;87(4):979-82.
  - 1064 11. Perry JJ, Lee JS, Sillberg VA, Wells GA. Rocuronium versus succinylcholine for rapid  
1065 sequence induction intubation. *Cochrane Database Syst Rev* 2008(2):CD002788.
  - 1066 12. Mazurek AJ, Rae B, Hann S, Kim JI, Castro B, Cote CJ. Rocuronium versus succinylcholine:  
1067 are they equally effective during rapid-sequence induction of anesthesia? *Anesth Analg*  
1068 1998;87(6):1259-62.
  - 1069 13. Larsen PB, Hansen EG, Jacobsen LS, et al. Intubation conditions after rocuronium or  
1070 succinylcholine for rapid sequence induction with alfentanil and propofol in the emergency  
1071 patient. *Eur J Anaesthesiol* 2005;22(10):748-53.
  - 1072 14. McCourt KC, Salmela L, Mirakhur RK, et al. Comparison of rocuronium and  
1073 suxamethonium for use during rapid sequence induction of anaesthesia. *Anaesthesia*  
1074 1998;53(9):867-71.
-

- 
- 1075 15. Lee C, Jahr JS, Candiotti KA, Warriner B, Zornow MH, Naguib M. Reversal of profound  
1076 neuromuscular block by sugammadex administered three minutes after rocuronium: a  
1077 comparison with spontaneous recovery from succinylcholine. *Anesthesiology* 2009;110(5):1020-  
1078 5.
- 1079 16. Vivien B, Adnet F, Bounes V, et al. Sédation et analgésie en structure d'urgence (   
1080 Réactualisation de la conférence d'experts de la Sfar de 1999). *Ann Fr Anesth Reanim* 2010.
- 1081 17. Adnet F, Borron SW, Racine SX, et al. The intubation difficulty scale (IDS): proposal and  
1082 evaluation of a new score characterizing the complexity of endotracheal intubation.  
1083 *Anesthesiology* 1997;87(6):1290-7.
- 1084 18. Fuchs-Buder T, Claudius C, Skovgaard LT, Eriksson LI, Mirakhur RK, Viby-Mogensen J. Good  
1085 clinical research practice in pharmacodynamic studies of neuromuscular blocking agents II: the  
1086 Stockholm revision. *Acta Anaesthesiol Scand* 2007;51(7):789-808.
- 1087 19. Cantineau JP, Tazarourte K, Merckx P, et al. [Tracheal intubation in prehospital  
1088 resuscitation: importance of rapid-sequence induction anesthesia]. *Ann Fr Anesth Reanim*  
1089 1997;16(7):878-84.
- 1090 20. Jabre P, Galinski M, Ricard-Hibon A, et al. Out-of-Hospital Tracheal Intubation With Single-  
1091 Use Versus Reusable Metal Laryngoscope Blades: A Multicenter Randomized Controlled Trial. *Ann*  
1092 *Emerg Med*.
- 1093 21. Langeron O, Bourgain JL, Laccoureye O, Legras A, Orliaguet G. [Difficult airway algorithms  
1094 and management: question 5. Societe Francaise d'Anesthesie et de Reanimation]. *Ann Fr Anesth*  
1095 *Reanim* 2008;27(1):41-5.
- 1096 22. Combes X, Jabre P, Margenet A, et al. Unanticipated Difficult Airway Management in the  
1097 Prehospital Emergency Setting: Prospective Validation of an Algorithm. *Anesthesiology* 2011;In  
1098 Press.
- 1099 23. EMEA/CHMP. Guideline on the choice of the non-inferiority margin. July 2005
- 1100 24. Chow and Liu .Design and Analysis of bioavailability and bioequivalence studies. M.Dekker Eds  
1101 New-York 1992
- 1102 25. Dunnet CW, Gent M. Significance testing to establish equivalence between treatments with  
1103 special reference to data in the form of 2 × 2 tables. *Biometrics* 1977;33:593–602.
- 1104 26. Roebruck P, Kuhn A (1995) Comparison of tests and sample size formulae for proving  
1105 therapeutic equivalence based on the difference of binomial probabilities. *Stat Med* 14: 1583–  
1106 1594.
- 1107  
1108  
1109  
1110  
1111
-

1112 **ANNEXES**1113 **ANNEX 1 : LIST OF RESEARCH CENTRES**

| Main researcher of the centre (name, title) | Service/Role                 | Address of hospital centre                                                                | Telephone number | Fax            |
|---------------------------------------------|------------------------------|-------------------------------------------------------------------------------------------|------------------|----------------|
| Dr Benoit Vivien                            | SAMU 75                      | CHU Necker - Enfants Malades, 149 rue de Sèvres, 75015 PARIS                              | 01 44 49 24 72   | 01 44 49 23 25 |
| Pr Marc Freysz                              | SAMU 21                      | CHU de Dijon, 3 rue du Faubourg Raines, 21034 DIJON Cedex                                 | 03 80 29 37 70   | 03 80 29 31 23 |
| Pr Jean-Emmanuel De La Coussaye             | SAMU 30                      | CHU Nîmes, Place du Professeur Robert Debré, 30029 NIMES Cedex                            | 04 66 68 30 50   | 04 66 68 38 51 |
| Pr Eric Wiel                                | SAMU 59                      | CHRU de Lille 5 avenue Oscar Lambret, 59037 LILLE cedex                                   | 03 20 44 46 38   | 03 20 44 49 15 |
| Dr Karim Tazarourte                         | SAMU 77                      | CH Marc Jacquet, Rue Fréteau de Pény, 77011 MELUN Cedex                                   | 01 64 71 61 27   | 01 64 71 62 62 |
| Dr Agnès Ricard-Hibon                       | SMUR Beaujon                 | CHU Beaujon, 100 boulevard du Général Leclerc, 92110 CLICHY LA GARENNE                    | 01 40 87 59 13   | 01 40 87 58 59 |
| Pr Frédéric Adnet                           | SAMU 93                      | CHU Avicenne, 125 rue de Stalingrad, 93009 BOBIGNY Cedex                                  | 01 48 96 44 08   | 01 48 96 44 93 |
| Dr Papa Gueye                               | SMUR Lariboisière            | CHU Lariboisière , 2, rue Ambroise-Paré, 75475 PARIS Cedex                                | 01 49 95 63 91   | 01 49 95 85 45 |
| Dr Jean Louis Sebbah                        | SMUR Gonesse                 | CH Gonesse, 25, rue Pierre de Theilley, GONESSE                                           | 01 34 53 21 21   | 01-34-53-21-90 |
| Dr Gérald.Kierzek                           | SMUR Hôtel Dieu (75)         | CHU de l'Hôtel-Dieu, 1 Place du Parvis de Notre Dame, 75004 PARIS                         | 01 42 34 88 19   | 01 42 34 85 53 |
| Dr François Dolveck                         | SAMU 92                      | CHU Raymond Poincaré, 104 boulevard Raymond Poincaré, 92380 GARCHES                       | 01 47 10 70 01   | 01 47 10 70 07 |
| Dr Patrick Ecollan                          | SMUR Pitié-Salpêtrière (75)  | CHU Pitié-Salpêtrière, 47-83 boulevard de l'Hôpital, 75013 PARIS                          | 01 42 16 22 51   | 01 42 16 22 69 |
| Dr Dominique Savary                         | SAMU 74                      | CH Annecy, 1 avenue de l'hôpital, 74370 PRINGY                                            | 04 50 63 63 63   | 04 50 45 59 30 |
| Dr Bertrand Guihard                         | SAMU 974                     | CHR Félix Guyon, 97405 SAINT DENIS Cédex, ILE DE LA RÉUNION                               | 02 62 90 60 76   | 02 62 90 57 01 |
| Dr Pierre Jean Marianne                     | SMUR St Pierre de la Réunion | CHR de la Réunion – Site du GHSR, Bd François Mitterrand, BP 350 97448 Saint Pierre Cedex | .....            | .....          |
| Dr Vincent Bounes                           | SAMU 31                      | CHU Purpan, TSA 40031, Toulouse                                                           | 05 67 69 14 21   | 05 67 69 16 54 |

---

1114 ANNEX 2 : CLASSIFICATION OF LARYNGEAL VIEW AFTER DIRECT LARYNGOSCOPY ACCORDING  
1115 TO CORMACK AND LEHANE.

1116

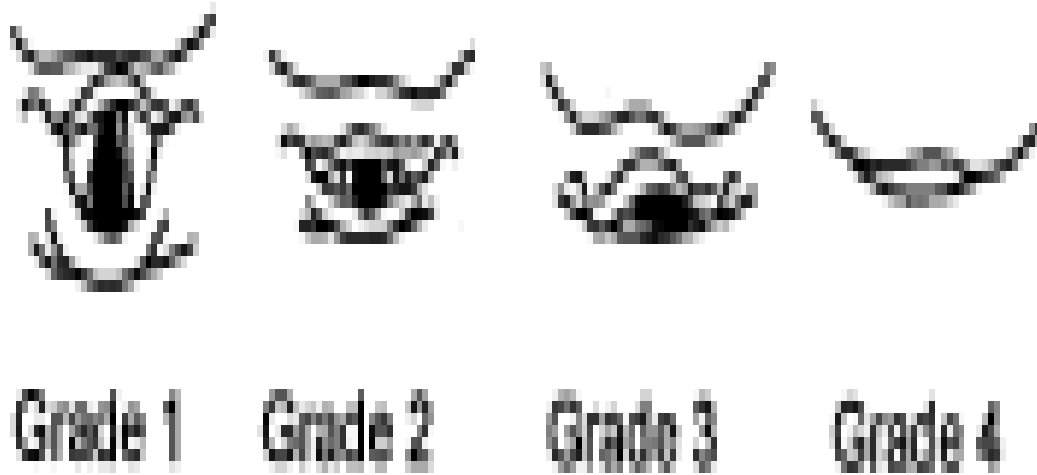

1117

1118

1119 Grade 1 : The whole glottic slit is visible

1120 Grade 2 : Only the front part of the glottis is visible

1121 Grade 3 : Only the epiglottis is visible

1122 Grade 4 : The epiglottis is not visible

---

1123 **ANNEX 3 : INTUBATION DIFFICULTY SCORE (IDS)**

1124

**Number of additional tests**

(No point is added for the first attempt, count **ALL** additional attempts)

**Number of additional operators**

An operator is someone who tries to perform the intubation (no point is added for the first operator, indicate the number of additional operators)

**Cormack Grade minus one**

Grade I equals 0 points, grade II equals 1 point, etc. The Cormack grade should be evaluated at the first attempt. If the **first** blind technique is **successful**, allot 0 points, otherwise indicate the grade of the next laryngoscopy.

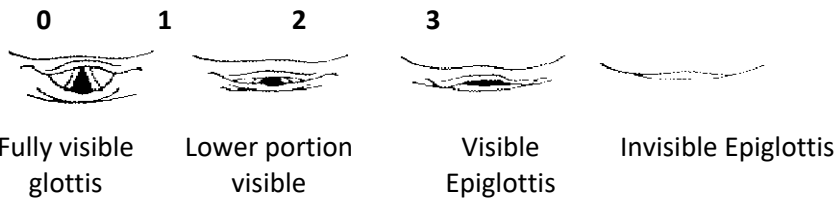

**Tractive Force on the laryngoscope**

Normal (standard cad) = 0 point; increased (unusual cad) = 1 point

**External pressure on the larynx**

Not applied: 0 point, applied: 1 point. No points added for the Sellick manoeuvre

**Mobility of vocal chords**

Abduction = 0 point; adduction (obstructing the passage of the probe) = 1 point

**Number of techniques used**

E.g. the addition of a tube is a new technique; (see list below) ; no points allotted for the first technique.

☒. **If intubation is impossible : write down the value of the IDF before ceasing the procedure and mark with a cross here:** ☒

|  |
|--|
|  |
|  |
|  |

|  |
|--|
|  |
|  |
|  |
|  |

**Total points: I.D.S. =**

|  |
|--|
|  |
|--|

1125

---

1126 **ANNEX 4 : COPENHAGEN SCORE**

1127

1128

1129

1130

| Evaluated Variables                        | Clinically acceptable |                     | Clinically not acceptable |
|--------------------------------------------|-----------------------|---------------------|---------------------------|
|                                            | Excellent             | Good                | Poor                      |
| Laryngoscopy                               | Easy                  | Moderate difficulty | Difficult                 |
| Position of the vocal chords               | Abduction             | Interim Position    | Closed                    |
| Reaction to insertion of the tracheal tube | None                  | Moderate            | Vigorous                  |

1131

1132

1133 **Intubation Conditions :**

1134 Excellent : if all variables are rated as excellent

1135 Good: if all variables are rated good or excellent

1136 Poor: if any one variable is rated as poor

1137

---



1138 **ANNEX 5. ALGORITHM IN THE EVENT OF AN UNANTICIPATED DIFFICULT INTUBATION (AS PER**  
1139 **21 AND 22)**

1140

1141 Failure to intubate after two direct laryngoscopies with optimisation of the position of the head

1142

1143

1144 Small ways (so-called BURP manoeuvre) and potential change of operator  
1145 (only one new attempt of a direct laryngoscopy)

1146

1147

1148 Success

1149

Use of long tube (two attempts)

1151

1152

1153

1154 Success

1155

1156

Use of Fastrach intubation mask

1158

1159

Intubation with the Fastrach mask

1160

1161

1162

1163 Yes

1164

No

1165

Ventilation possible with the Fastrach mask

1166

1167

1168 Yes

1169

1170

1171 Transportation to the hospital with the Fastrach  
1172 mask

1173

1174

1175

Non

1176 Direct tracheal accessibility  
1177 (cricothyrotomy)

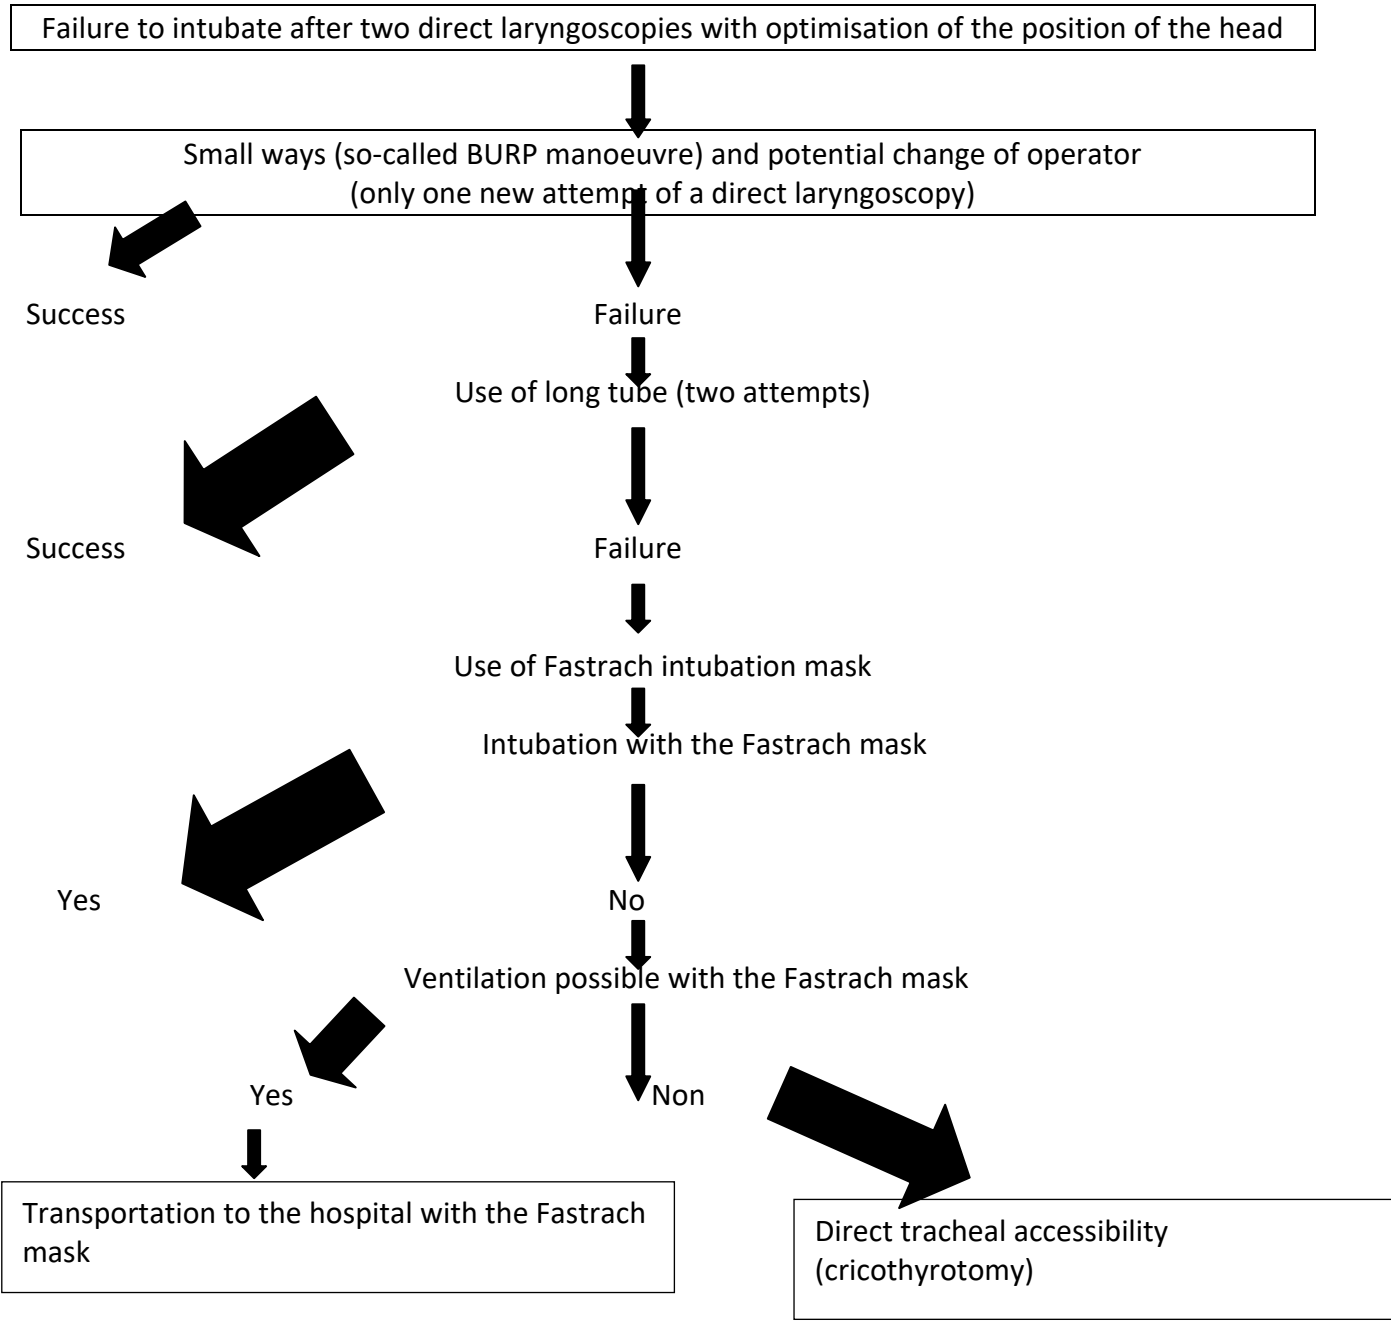

---

1176 **ANNEX 6.1 BRIEFING NOTE TO PATIENTS**

1177  
1178 **Comparison of the usage of succinylcholine and rocuronium for intubation in pre-**  
1179 **hospitalization emergencies. A multi-centric, non-inferiority, randomized, controlled and blind**  
1180 **study: CURASMUR**

1181  
1182  
1183 **Promoter: CHR of Reunion Island**

1184  
1185 **BRIEFING NOTE**  
1186

---

1187  
1188 **Dear Ma'am, Miss, Sir,**  
1189

1190 Doctor ..... (surname, first name), practising at the ..... hospital, would like to offer you  
1191 the opportunity to participate in a medical research project in relation to the illness that you are  
1192 presenting with. It is important that you read this note carefully before making your decision; do not  
1193 hesitate to request further explanation from the doctor.

1194 Should you decide to participate in this research, you will be asked to give written consent.  
1195

1196 **1) What is the purpose of this research?**  
1197

1198 This research deals with the comparison between two medications of which the effect is to relax the  
1199 muscles in order to facilitate a tracheal intubation. The goal is to show that these two medications are  
1200 sufficiently effective to facilitate a tracheal intubation, in other words, inserting a tube into the trachea  
1201 which will allow for artificial ventilation of the lungs.

1202 In order to respond to the question posed in the research, it is foreseen that 1300 patients in  
1203 need of a tracheal intubation after being admitted by a SMUR (Emergency Resuscitation Unit),  
1204 will be included. 16 Emergency Resuscitation Units (SMUR) will participate in this research  
1205 throughout the whole of France.  
1206

1207 **2) What does the research consist of?**  
1208

1209 In the proposed research, we will assess the ease of intubation (in order words, insertion of an  
1210 intubation tube to your trachea) according to what is used for the relaxation of your muscles at  
1211 the time of this action, two different medications classified as curares : succinylcholine or  
1212 rocuronium. You will receive an injection intravenously of either succinylcholine or rocuronium. A  
1213 random draw will be done to determine which of the two medications will be used. In the case of  
1214 emergency intubation, the recommendation is to use a curare to facilitate intubation and which  
1215 lowers the risk of complications that could occur during this procedure. The curare that is  
1216 currently recommended and which has been used for many years in these circumstances is  
1217 succinylcholine. The main advantage of succinylcholine is its fast reaction, less than 1 minute,  
1218 which also makes it possible for the intubation to be done very quickly. Furthermore, its onset is  
1219 short, around 10 minutes, which allows the patient to resume spontaneous breathing quickly  
1220 should the insertion of the intubation tube be difficult. Succinylcholine presents some side  
1221 effects, but rarely, (allergy, decrease in heart rate) and there are situations where its use is

---

---

1222 expressly contraindicated: when the kalaemia (rate of potassium in blood) is elevated, in cases of  
1223 neuromuscular disease or if there is former paraplegia, tetraplegia or hemiplegia (in order words,  
1224 present after at least a few days). Rocuronium is a curare that has been used on the operating  
1225 table for many years to facilitate intubation of the trachea. The main complication reported with  
1226 the use of rocuronium is the extremely rare onset of allergies. Rocuronium is not contraindicated  
1227 in the cases of hyperkalaemia or neuromuscular diseases. By using rocuronium at a dosage of 1,2  
1228 mg/kg, which allows for speedy intubation, its onset delay is identical to that of succinylcholine,  
1229 thus it could be a substitute for emergency intubation. The problem with the use of high doses of  
1230 rocuronium is the fact that its onset (that is, the duration for which the muscles are relaxed) are  
1231 long, in the range of one hour. Recently a counteracting product to rocuronium has been made  
1232 available: sugammadex. This medication allows for the reversal, if necessary (that is, to  
1233 completely remove curarization) of rocuronium in less than 2 minutes. Sugammadex does not  
1234 present any reported serious side effects. The fact that it could counteract rocuronium speedily,  
1235 makes it possible for it to be used without risk of prolonged curarization in emergency situations.  
1236 Rocuronium could thus allow for an equally easy intubation as compared to succinylcholine with  
1237 less side effects. The goal of this study is to compare the effectiveness of rocuronium and  
1238 succinylcholine when these are used to facilitate intubation in emergency situations.

1239

1240 **3) What is the timeline of the research?**

1241

1242 The research will take place over 3 years and your participation will be for a few hours, limited to  
1243 the time that you are treated by SMUR before your arrival at the hospital. After signing consent,  
1244 after the first visit, we will not request any sample or specific text for this research from you.

1245

1246 **4) What are the benefits and limitations linked to your participation?**

1247

1248 There appears to be fewer side effects associated with the use of rocuronium, compared to the  
1249 use of succinylcholine. Receiving rocuronium could thus diminish the risk of adverse events  
1250 presenting, such as cardiac rhythm difficulties (bradycardia) or presenting with significant  
1251 hyperkalaemia. By participating in this research, you will benefit from close and specific medical  
1252 monitoring, for which no additional fees will be charged to you.

1253

1254 **5) What are the foreseen risks of the research?**

1255

1256 This study has the goal of illustrating that intubation is equally easy with the use of either  
1257 succinylcholine or rocuronium. Irrespective of the medication that is used, there is the risk of  
1258 serious allergic reaction but its prevalence is low (less than 1/10000). The potential risk with the  
1259 use of rocuronium, apart from allergic reactions, is the prolonged curarization, but this risk is  
1260 eliminated when it is possible to counteract rocuronium with a heavy dose of sugammadex. No  
1261 serious complications have been reported with the use of sugammadex.

1262

1263 **6) What are the potential medical alternatives?**

1264

1265 In the event of non-participation in the research, the physician who will be treating you will apply  
1266 the national recommendations concerning emergency intubation. The intubation will be done,

---

---

1267 except in the event of contraindication, using succinylcholine which is the current recommended  
1268 curare in this indication.

1269

1270 **7) What are the medical care procedures at the end of your participation?**

1271

1272 Your medical care procedures will remain unchanged with regard to a standard care procedure.

1273

1274 **8) If you participate, what will happen with the data collected for the research?**

1275

1276 In the framework of the biomedical research in which the CHR of Reunion Island is inviting you to  
1277 participate, processing of your personal data will be done in order to analyse the research results  
1278 with regard to its objective as presented to you.

1279 For this purpose, the medical data concerning you will be sent to the sponsor of the research or  
1280 the persons or companies operating on their behalf, in France or abroad. These data will be  
1281 identified by code number and your initials. These data could also, where the conditions assure  
1282 their confidentiality, be sent to the French health authorities [or foreign authorities, or other  
1283 entities of the CHR of Reunion Island].

1284 For any ceasing of participation without withdrawal of consent, the data previously collected  
1285 prior to this ceasing will be used, unless you wish for it not be used.

1286

1287 **9) How is this research overseen?**

1288

1289 The CHR of Reunion Island has underwritten an insurance (membership number) assuring their  
1290 civil responsibility and that of each participant alongside SHAM.

1291

1292 The CHR of Reunion Island has taken all provisions as foreseen by the law related to the  
1293 protection of persons participating in biomedical research, Huriet law (n° 88-1138) of 20  
1294 December 1988, modified by the Public Health Law (n° 2004-806) of 9 August 2004.

1295

1296 The CHR of Reunion Island has obtained the favourable opinion of the Institutional Review Board  
1297 of the South-West and Overseas Region III for this research on [*indicate the date of the meeting*  
1298 *in the format dd/mm/yyyy*] and authorisation from the French Agency for the Safety of Health  
1299 Products (Afssaps).

1300

1301 **10) What are your rights?**

1302

1303 Your participation in this research project is entirely free and voluntary. Your decision will not  
1304 incur any prejudice on the quality of care and treatments to which you are entitled.

1305

1306 You can ask for explanations on the progress of the research at any time during the research,  
1307 from the physician monitoring you.

1308

1309 You may withdraw from the research any time without explanation, without consequence on the  
1310 monitoring of your treatment, nor the quality of care that will be provided to you and without

---

---

1311 any consequence on the relationship with your physician. Once this withdrawal is issued, you  
1312 could still be monitored by the same medical team.

1313

1314 In accordance with the provisions of the CNIL (law related to information technology, data files  
1315 and civil liberties) you have the right of access and rectification. You equally have the right to  
1316 oppose to the transmission of data covered by professional secrecy that could be used in the  
1317 framework of this research and processed. These rights are practiced alongside the physician in  
1318 charge of the research who is the sole person aware of your identity. You could also directly  
1319 access, or have access via an intermediary of a physician of your choice to the totality of your  
1320 medical data under the provisions of Article L 1111-7 of the Public Health Code.

1321

1322 Your medical file will remain confidential and could only be consulted under the responsibility of  
1323 the physician in charge of your treatment as well as by the health authorities, and persons duly  
1324 authorised by the CHR of Reunion Island for the research, and subject to professional secrecy.

1325

1326 At the end of the research and after analysis of the data related to this research, you may be  
1327 informed of the overall results by the intermediary of the physician monitoring you in the  
1328 framework of this research.

1329

1330 Should you agree to participate in the research after having read all information and after having  
1331 discussed all the aspects with your physician, you will have to sign and date the clear consent  
1332 form which can be found at the end of this document.

1333

1334

---

---

1335 **ANNEX 6.2 BRIEFING NOTE FOR AN ADULT INDIVIDUAL PARTICIPATING IN BIOMEDICAL**  
1336 **RESEARCH (TRACKING IN RESEARCH AFTER EMERGENCY SITUATION)**

1337  
1338 **Comparison of the usage of succinylcholine and rocuronium for intubation in pre-**  
1339 **hospitalization emergencies. A multi-centric, non-inferiority, randomized, controlled and blind**  
1340 **study: CURASMUR**  
1341

1342 **Sponsor: CHR of Reunion Island**  
1343

1344 **Dear Sir/Ma'am,**

1345 Due to the seriousness of your condition and the medical emergency, we were unable to request  
1346 your prior consent and you have been included on the / / in a biomedical research project titled  
1347 "Comparison of the usage of succinylcholine and rocuronium for intubation in pre-hospitalization  
1348 emergencies. A multi-centric, non-inferiority, randomized, controlled and blind study".

1349 In accordance with the law (Art. L.1122-1-2 of the Public Health Code), it is the support person  
1350 designed by you or your parent, if this person was present at the time of your care, from whom  
1351 agreement to your participation in this research was requested. Otherwise the law authorises us to  
1352 include persons without their consent in medical emergency situations.

1353 Now that you are able to understand and express your volition, we are requesting your agreement  
1354 to track your participation in this biomedical research project.  
1355

1356 You were treated by a SMUR team (Mobile Emergency Resuscitation unit) because you were  
1357 presenting with vital distress signs. During your treatment it was necessary to perform a tracheal  
1358 intubation in order to ensure artificial ventilation by means of an intubation tube. In order to insert  
1359 this intubation tube, sedation is needed. You were thus administered, intravenously, with a  
1360 hypnotic drug of which the purpose is to render you unconscious at the time of intubation.  
1361 Another medication is needed to be able to perform this intubation in the best conditions, which is  
1362 a curare that relaxes all the muscles for a few minutes and in particular those of the upper airways  
1363 that control the vocal chords. The use of a curare makes intubation easier and minimises the risks  
1364 that could be associated with it. The curare that is generally used is succinylcholine which allows  
1365 for an emergency intubation to be done in less than 1 minute and of which the length of onset is  
1366 short (approximately 8 minutes) which allows the patient to resume effective spontaneous  
1367 breathing quickly should intubation prove to be impossible.. This medication has some side effects  
1368 that are rare but which could be severe : allergy, hyperkalaemia (fierce increase of concentration  
1369 of potassium in blood) which could lead to cardiac rhythm difficulties, slowing heart rate. Another  
1370 curare, rocuronium has been used for a number of years on the operating table. At a dose that is  
1371 slightly higher than that used in the operating room, it makes it possible to perform an intubation  
1372 just as quickly as with succinylcholine. Up until now rocuronium has not been used often for  
1373 emergency intubation as its duration of action (time during which the muscles are relaxed) is long  
1374 (approximately one hour) and in the event where it is impossible to insert the intubation tube,  
1375 spontaneous breathing does not resume quickly.  
1376

---

---

1377 A counteracting drug to rocuronium has been available for some months. This medication is called  
1378 sugammadex. It makes it possible to counteract the effects of rocuronium in a few minutes.  
1379 Sugammadex is a medication which presents very few side effects, the most of which are not  
1380 serious (sensation of metallic taste in the mouth, very rare allergic reactions). Sugammadex  
1381 counteracts the effect of rocuronium in less than 2 minutes, when administered at a dose of 16  
1382 mg/kg. The fact that it can counteract rocuronium quickly in the case of difficult intubation makes  
1383 its use possible in emergency and it could replace succinylcholine, particularly when the latter is  
1384 contraindicated. These two medications have already been compared in the operating room in  
1385 patients needing to be anaesthetised outside of an emergency situation. Rocuronium, when used  
1386 at a dose of 1,2 mg/kg has, in these circumstances, made intubation possible in the same  
1387 conditions as those obtained with succinylcholine.

1388 At present, rocuronium and succinylcholine have not been compared in emergency situations  
1389 outside the hospital. Before the use of rocuronium can be recommended for performing  
1390 emergency intubations, it needs to be determined whether this medication is equally effective as  
1391 succinylcholine which remains the curare of reference for now, for emergency intubations.

1392 It is the reason why you have been included in this study, where patients treated for a vital distress  
1393 and in need of a tracheal intubation, receive, after a random draw either succinylcholine or  
1394 rocuronium to facilitate the insertion of the intubation tube to the trachea. Once this study has  
1395 been completed, it will be possible to determine whether rocuronium could be used instead of  
1396 succinylcholine in emergency medical treatment, and with the same effectiveness.

1397 This study has an expected duration of 3 years, which will allow for the inclusion of approximately  
1398 1300 patients.

1399 The length of your monitoring in this study will not exceed a few hours, correspondent to the  
1400 period during which you have been treated by the SMUR team.

1401 The study will consist of evaluating the conditions in which intubation is performed and measuring  
1402 whether the difficulty of intubation was different where succinylcholine or rocuronium were used.  
1403 All potential side effects linked to the use of the products in question will be analysed. No exam  
1404 (radiology, taking blood) or additional consultation with regard to a standard care is foreseen for  
1405 this study.

1406 The protocol does not in any way modify the nature of your treatment which will be done  
1407 according to the current recommendations.

1408  
1409

---

1410 **ANNEX 6.3 CONSENT FORM FOR PARTICIPATION IN BIOMEDICAL RESEARCH (TRACKING POST-**  
1411 **EMERGENCIES)**

1412 **Comparison of the usage of succinylcholine and rocuronium for intubation in pre-**  
1413 **hospitalization emergencies. A multi-centric, non-inferiority, randomized, controlled and blind**  
1414 **study: CURASMUR**

1415 **Sponsor : CHR of Reunion Island**

1416 I, the undersigned

1417 Mrs., Miss, Mr. *(cross out the titles that do not apply)* (surname, first  
1418 name).....

1419 freely and voluntarily accept to continue participating in the biomedical research project titled  
1420 « **Comparison of the usage of succinylcholine and rocuronium for intubation in pre-hospitalization**  
1421 **emergencies. A multi-centric, non-inferiority, randomized, controlled and blind study** » of which the  
1422 CHR of Reunion Island is the sponsor, and which has been proposed to me by Doctor *(surname, first*  
1423 *name, telephone number*

1424 *)*....., the physician  
1425 in this research project.

1426 Given that :

- 1427 - The physician who informed me and answered all my questions, made it clear to me that my  
1428 participation is voluntary and that I have the right to withdraw from this research at any point,
- 1429 - Before participating in this research project, I received a medical exam of which the results were  
1430 communicated to me,
- 1431 - I could be in contact with the physician during or at the publication of the research of information  
1432 concerning my health, which he possesses,
- 1433 - I have understood from the briefing note given to me that in order to participate in this research, I  
1434 need to be a member or beneficiary of a medical aid scheme. I confirm that this is the case.
- 1435 - I am fully aware that I can withdraw my consent to participate in this research at any point,  
1436 irrespective of my reasons and without any responsibility to do so, but I hereby agree to inform the  
1437 physician in that event.,
- 1438 - Should I wish, I will be informed by the physician of the overall results of this research once it has  
1439 been completed,
- 1440 - My consent does not in any form release the physician and the promoter of the totality of their  
1441 responsibilities and I reserve my rights as accorded me by the law.
- 1442 - My participation in this research project implies that I would not be able to participate in any other  
1443 biomedical research project for a period of 60 days.

1444  
1445 Signed at .....

1446  
1447 Date : ..... Signature

1448  
1449  
1450  
1451  
1452 **Signature of the physician** who certifies having fully explained the goal, terms and conditions as well as  
1453 potential risks of the research project to the person signing this document.

1454  
1455 Date : ..... Signature

1456  
1457  
1458  
1459



1460  
1461

This document is to be made available in 3 original copies, of which the first should be kept for 30 years by the researcher, a second copy sent to the person giving their consent and the third sent to the sponsor.

1462

**ANNEX 6.4 : COLLECTION OF EMERGENCY CONSENT**

1463  
1464  
1465

**Comparison of the usage of succinylcholine and rocuronium for intubation in pre-hospitalization emergencies. A multi-centric, non-inferiority, randomized, controlled and blind study: CURASMUR**

1466  
1467  
1468

**Sponsor : CHR of Reunion Island**

1469  
1470  
1471  
1472

I, the undersigned, Dr. .... (surname and first name), researcher for the Curasmur study at ..... (Name of centre) hereby confirm having included :

1473  
1474

on ..... / ..... / ....., the patient I \_ I \_ I - I \_ I \_ I - I \_ I \_ I, by using the emergency procedure.  
Centre number – Patient number – Initials of patient

1475  
1476  
1477  
1478  
1479

In fact, the patient is currently unable to comprehend the information relating to the study and it is not possible to inform nor to obtain consent from the family or support person representing him/her.

1480  
1481  
1482

In accordance with Article L.1122-1-2 of the Public Health Code, I hereby commit myself to informing the patient, or the support person representing him, or the family as soon as possible and I will ask them their consent for the tracking of the research.

1483  
1484

Date : ..... Signature of Researcher : .....

1486  
1487  
1488  
1489

1490  
1491  
1492  
1493  
1494  
1495

This statement must be sent to the Resuscitation team that has the patient in their care. A copy of this statement will be kept by the researcher and another sent to the sponsor.

---

1496 **ANNEXE 6.5 : BRIEFING NOTE IN EMERGENCY SITUATIONS FOR THE REPRESENTATIVE OF A**  
1497 **PERSON UNABLE TO EXPRESS THEIR CONSENT TO PARTICIPATE IN THE BIOMEDICAL RESEARCH**  
1498 **PROJECT TITLED**

1499 **Comparison of the usage of succinylcholine and rocuronium for intubation in pre-**  
1500 **hospitalization emergencies. A multi-centric, non-inferiority, randomized, controlled and blind**  
1501 **study: CURASMUR**

1502  
1503 **Sponsor: CHR of Reunion Island**

1504 Dear Sir/Ma'am,

1505  
1506 Due to his current condition and the level of emergency, in accordance with the law, we are  
1507 approaching you for authorisation for the participation of Mrs., Miss, Mr. (cross out the titles that  
1508 do not apply) (surname, first name) ..... in this biomedical research project.

1509  
1510 Your family member is currently being treated by a SMUR (Mobile Emergency and Resuscitation  
1511 Services) Unit as he/she is presenting with a vital distress. His/her condition requires a  
1512 mechanical ventilation which will be done with a respirator. This mechanical ventilation cannot  
1513 be performed without an intubation tube that will be inserted into the trachea.

1514 In order to insert this intubation tube, sedation is necessary. A hypnotic drug, which has the  
1515 purpose of making him/her unconscious at the time of intubation, will be administered to your  
1516 family member intravenously. Another medication is necessary in order to do the intubation in  
1517 optimal conditions, this is a curare that relaxes all the muscles for a few minutes, particularly  
1518 those of the upper airways that control the vocal chords. The use of a curare makes intubation  
1519 easier and minimises the risks that could be associated with it. The curare that is generally used is  
1520 succinylcholine, which allows for an emergency intubation to be done in less than 1 minute and  
1521 of which the duration of action is short (approximately 8 minutes), and which allows the patient  
1522 to resume effective spontaneous breathing quickly should intubation prove to be impossible. This  
1523 medication has some side effects that are rare but which could be severe: allergy, hyperkalaemia  
1524 (fierce increase of concentration of potassium in blood) which could lead to cardiac rhythm  
1525 difficulties, slowing heart rate. Another curare, rocuronium, has been used for a number of years  
1526 in the operating room. At a dose that is slightly higher than that used in the operating room, it  
1527 makes it possible to perform an intubation just as quickly as with succinylcholine. Up until now  
1528 rocuronium has not been used often for emergency intubation as its duration of action (time  
1529 during which the muscles are relaxed) is long (approximately one hour) and in the event where it  
1530 is impossible to insert the intubation tube, spontaneous breathing does not resume quickly.

1531  
1532  
1533 A counteracting drug to rocuronium has been available for some months. This medication is called  
1534 sugammadex. It makes it possible to counteract the effects of rocuronium in a few minutes.  
1535 Sugammadex is a medication which presents very few side effects, the most of which are not  
1536 serious (sensation of metallic taste in the mouth, very rare allergic reactions). Sugammadex  
1537 counteracts the effects of rocuronium in less than 2 minutes, when administered at a dose of 16  
1538 mg/kg. The fact that it can counteract rocuronium quickly in the case of difficult intubation makes

---

---

1539 its use possible in emergency and it could replace succinylcholine, particularly when the latter is  
1540 contraindicated. These two medications have already been compared in the operating room in  
1541 patients needing to be anaesthetised outside of an emergency situation. Rocuronium, when used  
1542 at a dose of 1,2 mg/kg has, in these circumstances, made intubation possible in the same  
1543 conditions as those obtained with succinylcholine.

1544 At present, rocuronium and succinylcholine have not been compared in emergency situations  
1545 outside the hospital. Before the use of rocuronium can be recommended for performing  
1546 emergency intubations, it needs to be determined whether this medication is equally effective as  
1547 succinylcholine, which remains the curare of reference for now, for emergency intubations.

1548 It is for this reason that we are proposing that your family member participate in this study titled  
1549 **“Comparison of the usage of succinylcholine and rocuronium for intubation in pre-hospitalization  
1550 emergencies. A multi-centric, non-inferiority, randomized, controlled and blind study”**, where patients  
1551 treated for a vital distress and in need of a tracheal intubation, receive, after a random draw,  
1552 either succinylcholine or rocuronium to facilitate the insertion of the intubation tube to the  
1553 trachea. Once this study has been completed, it will be possible to determine whether rocuronium  
1554 could be used instead of succinylcholine in emergency medical treatment, and with the same  
1555 efficacy.

1556 This study has an expected duration of 3 years, which will allow for the inclusion of approximately  
1557 1300 patients.

1558 The length of monitoring of your family member in this study will not exceed a few hours,  
1559 correspondent to the period during which he/she will have been treated by the SMUR team.

1560  
1561 Of course, the protocol does not in any way modify the nature of the patient’s treatment which  
1562 will be done according to the current recommendations.

1563  
1564  
1565 The participation of Mrs., Miss, Mr. (cross out the titles that do not apply) (surname, first name)  
1566 ..... in this biomedical research project will not generate any supplementary fees  
1567 with respect to the existing ones associated with the standard monitoring of this illness.  
1568 Nevertheless, in order to participate in this research project, he/she needs to be a main member  
1569 or beneficiary of a medical aid scheme.

1570  
1571 The CHR of Reunion Island, who has arranged for this biomedical research in the capacity of  
1572 promoter, has contracted insurance in accordance with the legislative provisions, with SHAM.

1573  
1574 This research project has received the favourable opinion of the Institutional Review Board (CPP)  
1575 of the South-West and Overseas Region III, on the ... as well as the authorisation for  
1576 implementation from the relevant health authority. It is possible that this research project will  
1577 be interrupted, should the circumstances deem necessary, by the sponsor or at the request of  
1578 the health authority.

1579  
1580 In the context of the biomedical research project in which the CHR of Reunion Island is proposing  
1581 that your parent or family member take place, a treatment of his personal data will be  
1582 implemented in order to facilitate analysis of the research results with regard to the objective of  
1583 said research as presented to you.

---

---

1584 For this purpose, the medical data concerning your parent or family member and the data  
1585 relating to his/her lifestyle habits will be sent to the sponsor of the research or to the persons or  
1586 companies standing in on his behalf, in France or abroad. This data will be identified by a code  
1587 number and his/her initials. This data could also, where the conditions guarantee confidentiality,  
1588 be sent to the French or foreign health authorities, or to other CHR entities of Reunion Island. In  
1589 accordance with the law relating to Information Technology, Data Files and Civil Liberties (CNIL)  
1590 you will have to the right to access and rectification. You equally have the right to oppose to the  
1591 transmission of data covered by professional secrecy that are likely to be used in the context of  
1592 this research and be processed.

1593

1594 We hereby inform you that you are free to either agree to or not agree to the participation of  
1595 your parent or family member in this research project.

1596

1597 You may at any point exercise your right to withdraw regarding the participation of this person.

1598

1599 Once it becomes medically possible, we will ask him/her directly for their opinion regarding the  
1600 tracking of their participation in this research.

1601

1602 Once you have read this briefing note and have obtained answers to the questions you may have  
1603 asked while consulting with the physician, you will be asked, if you agree, to give your written  
1604 authorisation by signing the form prepared for this purpose.

1605

---

**ANNEXE 6.6 : CONSENT FORM FOR PARTICIPATION IN A BIOMEDICAL RESEARCH PROJECT IN AN EMERGENCY SITUATION BY THE REPRESENTATIVE OF A PERSON UNABLE TO GIVE THEIR CONSENT.**

**Comparison of the usage of succinylcholine and rocuronium for intubation in pre-hospitalization emergencies. A multi-centric, non-inferiority, randomized, controlled and blind study: CURASMUR**

**Sponsor: CHR of Reunion Island**

I, the undersigned,

Mrs., Miss, Mr. *(cross out the titles that do not apply) (surname, first name)*.....

**freely and voluntarily accept**, in my capacity as parent, support person\* *(cross out the ones that do not apply)* that Mrs., Miss, Mr. *(cross out the titles that do not apply)* **(surname, first name)** .....

**participate in this biomedical research project titled "Comparison of the usage of succinylcholine and rocuronium for intubation in pre-hospitalization emergencies. A multi-centric, non-inferiority, randomized, controlled and blind study"** of which the Assistance Publique - Hôpitaux de Paris is the sponsor and which has been proposed to me by Doctor *(surname, first name, telephone number)* ....., physician in this research project.

Given that:

- The physician who informed me and answered all my questions, made it clear to me that I have the right to agree to or refuse that my parent or family member participate in this research.
- Before participating in this research, this person received a medical exam of which the results have been communicated to me,
- I will be able to communicate with the physician through the course of or at the publication of research information regarding his health, which he (the physician) possesses,
- I am fully aware that I can withdraw my consent for his/her participation in this research at any point, irrespective of my reasons and without any responsibility to do so, but I hereby agree to inform the physician in that event. The fact that he/she will no longer be participating in this research will not jeopardise my relationship with the physician who will be approaching me, if necessary, for another treatment for my parent or family member.
- Should I wish, I will be informed by the physician of the overall results of this research once it has been completed,
- My consent does not in any way release the physician and sponsor of all their responsibilities, and my parent or family member reserve their rights as per the law.
- The participation of this person in this research project implies that he/she will not be able to participate in another biomedical research project for a period of 60 days.

**Relationship with person in question:** .....

Signed at .....

Date : .....

Signature

**Signature of the physician** who certifies having fully explained the goal, terms and conditions as well as potential risks of the research project to the person signing this document.

Date : .....

Signature

\* The support person needs to have been designated previously, in written form, by the patient (Art. L.1111-6 CSP).

656  
657  
658  
659  
660

- 
1. Jabre P, Galinski M, Ricard-Hibon A, et al. Out-of-hospital tracheal intubation with single-use versus reusable metal laryngoscope blades: a multicenter randomized controlled trial. *Annals of emergency medicine*. Mar 2011;57(3):225-231.
