# Supplementary material
Source: PubMed Central journal article supplement (PMC6990819)
Supplement: jama-322-2303-s002.pdf [file jama-322-2303-s002.pdf]

## Supplementary Online Content

Guihard B, Chollet-Xémard C, Lakhnati P. Effect of rocuronium vs succinylcholine on endotracheal intubation success rate among patients undergoing out-of-hospital rapid sequence intubation: a randomized clinical trial. *JAMA*. doi:10.1001/jama.2019.18254

**eMethods.** Process for obtaining consent

**eTable 1.** ITT analysis

**eTable2.** Subgroup analyses for the primary outcome

**eFigure1.** Randomized patients age distribution

This supplementary material has been provided by the authors to give readers additional information about their work.

26 **Process for obtaining consent**

27

28

29 a)The legal representative was present and the clinical situation of the patient allowed oral  
30 information of the relative before intubation. Oral consent from relative was obtained just before  
31 intubation and just after intubation; the legal representative signed consent once the patient had  
32 been stabilized.

33 b) The legal representative was present but the patient's clinical situation required immediate  
34 intubation. Written Consent to continue the study was requested from the legal representative after  
35 intubation was performed.

36 c) No relatives were present.

37 1. The Patient was contacted by mail after his hospitalization to ask if he (or she) was opposed to his  
38 inclusion.

39 2. If the patient died, a letter was sent to a legal representative.

40

41 For 382 patients (31.4%) a relative was present at the moment of intubation. Among these 382  
42 relatives, 290 have signed the consent just before inclusion and 92 just after inclusion and  
43 intubation.

9 eTable 1. ITT analysis

|                                                           | No/Total No (%) of patients |                              | Absolute Difference<br>(95% CI) <sup>a</sup> | P-value <sup>b</sup> |
|-----------------------------------------------------------|-----------------------------|------------------------------|----------------------------------------------|----------------------|
|                                                           | Rocuronium<br>(n = 613)     | Succinylcholine<br>(n = 617) |                                              |                      |
| <b>Primary outcome : successful first pass intubation</b> | 456/613(74.4)               | 489/617 (79.2)               | -4.8(-9.1 to ∞)                              |                      |
| <b>Secondary Outcomes</b>                                 |                             |                              |                                              |                      |
| <b>Pre-specified analyses</b>                             |                             |                              |                                              |                      |
| <b>Cormack and Lehane grade</b>                           |                             |                              |                                              |                      |
| I                                                         | 375/610 (61.5)              | 347/617 (56.2)               | 5.3 (-0.3 to 10.7)                           | 0.06                 |
| II                                                        | 126/610 (20.7)              | 173/617 (28.0)               | -7.3 (-11.1 to -3.6)                         | <.001                |
| III                                                       | 81/610 (13.2)               | 72/617 (11.7)                | 1.5 (-2.9 to 6.2)                            | 0.48                 |
| IV                                                        | 28/610 (4.6)                | 25/617 (4.1)                 | 0.5 (-1.5 to 2.6)                            | 0.60                 |
| <b>Intubation Difficulty Score, mean (SD)</b>             | 4.2 (2.9)                   | 4.1 (2.4)                    | 0.1 (-0.2 to 0.4)                            | 0.48                 |
| <b>Intubation Difficulty Score &gt; 5</b>                 | 139/606 (22.9)              | 130/615 (21.1)               | 1.8 (-3.2 to 6.8)                            | 0.48                 |
| <b>Copenhagen Score</b>                                   |                             |                              |                                              |                      |
| Excellent                                                 | 327/580 (56.4)              | 313/585 (53.5)               | 2.9 (-0.6 to 6.5)                            | 0.10                 |
| Good                                                      | 205/580 (35.3)              | 223/585 (38.1)               | -2.8 (-6.4 to 0.4)                           | 0.08                 |
| Poor                                                      | 48/580 (8.3)                | 49/585 (8.4)                 | -0.1 (-3.0 to 2.9)                           | 0.97                 |
| <b>Need for alternative intubation techniques</b>         |                             |                              |                                              |                      |
| Stylet                                                    | 55/613 (9.0)                | 51/617 (8.3)                 | 0.7 (-1.9 to 1.9)                            | 0.97                 |
| Gum elastic bougie                                        | 114/613 (18.6)              | 107/617 (17.3)               | 1.3 (-1.2 to 3.8)                            | 0.31                 |
| Intubating laryngeal mask airway                          | 10/613 (1.6)                | 2/613 (0.3)                  | 1.3 (0.5 to 2.4)                             | 0.004                |
| Cricothyrotomy                                            | 0/613 (0.0)                 | 1/617 (0.2)                  | -0.2 (-)                                     | NC                   |
| <b>Complications</b>                                      |                             |                              |                                              |                      |
| Arterial desaturation                                     | 56/613 (9.1)                | 61/617 (9.9)                 | -0.8 (-4.2 to 2.7)                           | 0.67                 |
| Severe Arrhythmia                                         | 13/612 (2.1)                | 26/617 (4.2)                 | -2.1 (-3.8 to -0.4)                          | 0.01                 |
| Cardiac arrest                                            | 22/611 (3.6)                | 13/616 (2.1)                 | 1.5 (-0.2 to 3.3)                            | 0.08                 |
| Pulmonary inhalation                                      | 19/612 (3.1)                | 21/617 (3.4)                 | -0.3 (-1.7 to 1.1)                           | 0.68                 |
| <b>Exploratory Analyses</b>                               |                             |                              |                                              |                      |
| <b>No. of intubation attempts, mean (SD)</b>              | 1.4 (0.8)                   | 1.3 (0.6)                    | 0.1 (0.05 to 0.2)                            | <.001                |
| 2 attempts                                                | 110/610 (18.0)              | 97/616 (15.8)                | 2.2 (-2.3 to 6.8)                            | 0.34                 |
| 3 attempts                                                | 34/610 (5.6)                | 27/616 (4.4)                 | 1.2 (-0.8 to 3.2)                            | 0.23                 |
| 4 or more attempts                                        | 10/610 (1.6)                | 3/616 (0.5)                  | 1.1 (0.2 to 2.0)                             | 0.01                 |
| <b>Intubation failure under direct laryngoscopy</b>       | 11/613 (1.8)                | 4/617 (0.7)                  | 1.1 (0.2 to 2.3)                             | 0.01                 |
| <b>Time of prehospital care, minutes, median (IQR)</b>    | 55 (39 – 80)                | 55 (38 – 78)                 | -2.2 (-6.9 to 2.5)                           | 0.36                 |
| Death during prehospital care                             | 6/610 (1.0)                 | 3/616 (0.5)                  | 0.5 (-0.4 to 1.3)                            | 0.26                 |
| <b>Complications</b>                                      |                             |                              |                                              |                      |
| <b>Number of complications per patient, mean (SD)</b>     | 0.3 (0.8)                   | 0.4 (0.9)                    | -0.1 (-0.2 to -0.05)                         | 0.04                 |
| <b>At least one life-threatening complication</b>         | 116/610 (19.0)              | 150/616 (24.3)               | -5.3 (-10.7 to 0.01)                         | 0.05                 |
| <b>Severe cardiovascular collapse</b>                     | 39/612 (6.4)                | 62/616 (10.1)                | -3.7 (-6.8 to -0.3)                          | 0.03                 |
| <b>Accidental Extubation</b>                              | 1/611 (0.2)                 | 4/616 (0.7)                  | -0.5 (-0.1 to 0.03)                          | 0.06                 |

10 <sup>a</sup>The estimated difference between the groups was calculated with a 2-sided 95% CI using a Generalized Estimated Equation model, in  
11 which center was specified as the clustering factor .

12 <sup>b</sup> Not corrected for multiple comparisons.

13

14 eTable2. Subgroup analyses for the primary outcome.

|                                  | N (%) of patients |                 | Absolute Difference<br>(1-sided 97.5% CI) <sup>a</sup> | p-value for<br>interaction |
|----------------------------------|-------------------|-----------------|--------------------------------------------------------|----------------------------|
|                                  | Rocuronium        | Succinylcholine |                                                        |                            |
| <b>Subgroup analyses</b>         |                   |                 |                                                        |                            |
| <b>Reason for intubation</b>     |                   |                 |                                                        |                            |
| Coma due to neurological disease | 236/313 (75.4)    | 239/304 (78.6)  | -3.2 (-8.5 to ∞)                                       | 0.24                       |
| Coma due to self-poisoning       | 78/107 (72.9)     | 97/124 (78.2)   | -5.3 (-12.3 to ∞)                                      |                            |
| Acute respiratory failure        | 76/101 (75.2)     | 63/71 (88.7)    | -13.5 (-21.3 to ∞)                                     |                            |
| Trauma                           | 39/51 (76.5)      | 40/52 (76.9)    | -0.4 (-13.8 to ∞)                                      |                            |
| Shock                            | 7/8 (87.5)        | 8/9 (88.9)      | -1.4 (-30.7 to ∞)                                      |                            |
| Others                           | 19/30 (63.3)      | 42/56 (75.0)    | -11.7 (-43.0 to ∞)                                     |                            |
| <b>Patient Position</b>          |                   |                 |                                                        |                            |
| Lying on the ground              | 116/161 (72.1)    | 145/187 (77.5)  | -3.4 (-11.6 to ∞)                                      | 0.87                       |
| Lying on a stretcher             | 247/324 (76.2)    | 244/307 (79.5)  | -3.3 (-10.0 to ∞)                                      |                            |
| Lying on a bed                   | 81/112 (72.3)     | 90/110 (81.8)   | -9.5 (-21.1 to ∞)                                      |                            |
| Other                            | 11/13 (84.6)      | 10/12 (83.3)    | 1.3 (-30.7 to ∞)                                       |                            |

15 <sup>a</sup>The estimated difference between the groups was calculated with a 1-sided 97.5% CI using a Generalized Estimated Equation model,  
 16 in which center was specified as the clustering factor. The margin for non-inferiority was set at -7%. A lower bound of the CI that did  
 17 not exceed this margin indicated non-inferiority.

18

19

20 eFigure1. Randomized patients age distribution.

21

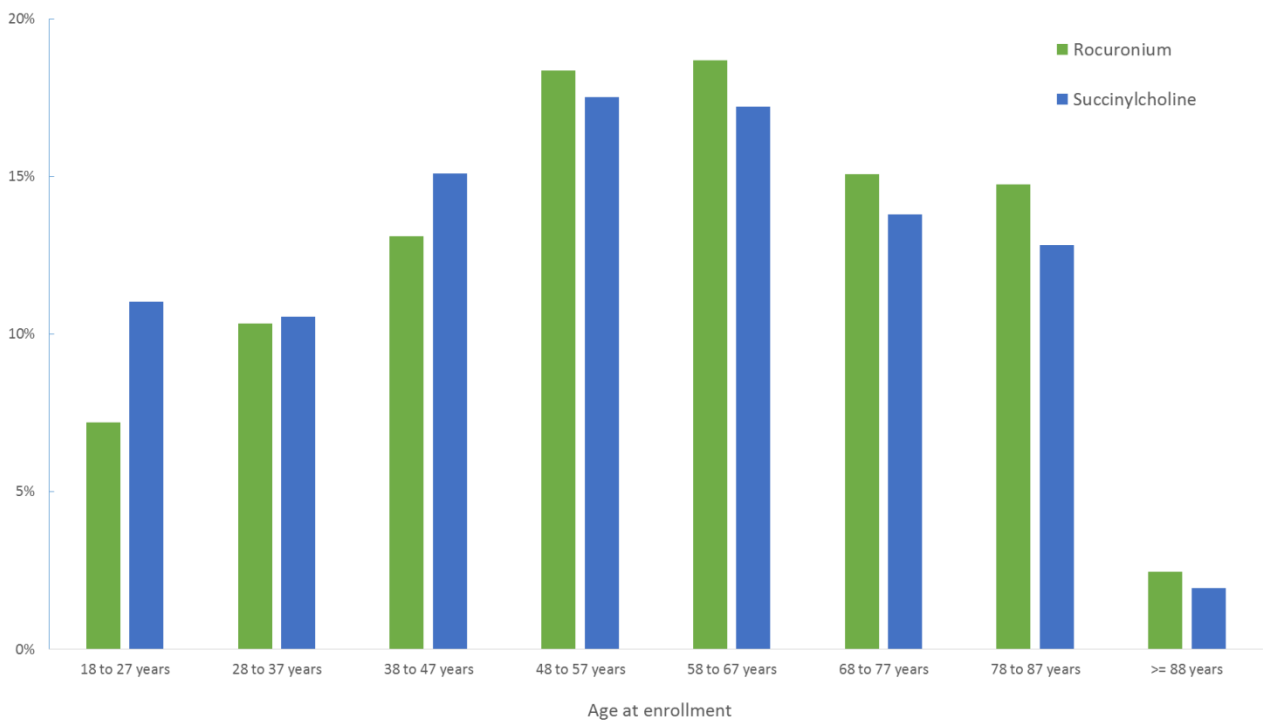

22

23

24

25
