# Supplementary material
Source: PubMed Central journal article supplement (PMC6990819)
Supplement: jama-322-2303-s004.pdf [file jama-322-2303-s004.pdf]

## **Data Sharing Statement**

**Data**

**Data available:** No
